# Supplementary material for: Quantitative uniqueness of human brain evolution revealed through phylogenetic comparative analysis
Source: eLife journal article supplement (doi:10.7554/elife.41250), 2019-01-31
Supplement: supp [file bayesmodels.results.hominins.removed.xlsx]

## Sheet: ECV~body mass
species	% preds higher than observed	% preds lower than observed	outlier status	run length	ess intercept	intercept stationarity test	p-value	ess coef predictor	coef predictor stationarity test	p-value	mean kappa	kappa freq	ess kappa	mean lambda	lambda freq	ess lambda
Australopithecus_africanus	0.00012502	0.99987	positive	7999	7999	passed	0.8506	7999	passed	0.4741	0.6331	0.5222	4177	0.9707	0.4778	3764.42
Homo_erectus	0	1	positive	7999	7999	passed	0.8506	7999	passed	0.4741	0.6331	0.5222	4177	0.9707	0.4778	3764.42
Homo_habilis	0	1	positive	7999	7999	passed	0.8506	7999	passed	0.4741	0.6331	0.5222	4177	0.9707	0.4778	3764.42
Homo_rudolfensis	0.00012502	0.99987	positive	7999	7999	passed	0.8506	7999	passed	0.4741	0.6331	0.5222	4177	0.9707	0.4778	3764.42
Homo_sapiens	0	1	positive	7999	7999	passed	0.8506	7999	passed	0.4741	0.6331	0.5222	4177	0.9707	0.4778	3764.42
Homo_sapiens_neanderthalensis	0	1	positive	7999	7999	passed	0.8506	7999	passed	0.4741	0.6331	0.5222	4177	0.9707	0.4778	3764.42
Paranthropus_boisei	0.00050006	0.9995	positive	7999	7999	passed	0.8506	7999	passed	0.4741	0.6331	0.5222	4177	0.9707	0.4778	3764.42
Paranthropus_robustus	0	1	positive	7999	7999	passed	0.8506	7999	passed	0.4741	0.6331	0.5222	4177	0.9707	0.4778	3764.42
Paranthropus_robustus	0	1	positive	7999	7999	passed	0.8506	7999	passed	0.4741	0.6331	0.5222	4177	0.9707	0.4778	3764.42

## Sheet: ECV~body mass alt.
species	% preds higher than observed	% preds lower than observed	outlier status	run length	ess intercept	intercept stationarity test	p-value	ess coef predictor	coef predictor stationarity test	p-value	mean kappa	kappa freq	ess kappa	mean lambda	lambda freq	ess lambda
Australopithecus_africanus	0	1	positive	7999	7999	passed	0.7681	7999	passed	0.7681	0.5857	0.4208	3366	0.9661	0.5792	4276.15
Homo_erectus	0	1	positive	7999	7999	passed	0.7681	7999	passed	0.7681	0.5857	0.4208	3366	0.9661	0.5792	4276.15
Homo_habilis	0	1	positive	7999	7999	passed	0.7681	7999	passed	0.7681	0.5857	0.4208	3366	0.9661	0.5792	4276.15
Homo_rudolfensis	0	1	positive	7999	7999	passed	0.7681	7999	passed	0.7681	0.5857	0.4208	3366	0.9661	0.5792	4276.15
Homo_sapiens	0	1	positive	7999	7999	passed	0.7681	7999	passed	0.7681	0.5857	0.4208	3366	0.9661	0.5792	4276.15
Homo_sapiens_neanderthalensis	0	1	positive	7999	7999	passed	0.7681	7999	passed	0.7681	0.5857	0.4208	3366	0.9661	0.5792	4276.15
Paranthropus_boisei	0.00037505	0.99962	positive	7999	7999	passed	0.7681	7999	passed	0.7681	0.5857	0.4208	3366	0.9661	0.5792	4276.15
Paranthropus_robustus	0	1	positive	7999	7999	passed	0.7681	7999	passed	0.7681	0.5857	0.4208	3366	0.9661	0.5792	4276.15
Paranthropus_robustus	0	1	positive	7999	7999	passed	0.7681	7999	passed	0.7681	0.5857	0.4208	3366	0.9661	0.5792	4276.15
