# Supplementary material for: Quantitative uniqueness of human brain evolution revealed through phylogenetic comparative analysis
Source: eLife journal article supplement (doi:10.7554/elife.41250), 2019-01-31
Supplement: supp [file bayesmodels.results.xlsx]

## Sheet: ECV~body mass
species	% preds higher than observed	% preds lower than observed	outlier status	run length	ess intercept	intercept stationarity test	p-value	ess coef predictor	coef predictor stationarity test	p-value	mean kappa	kappa freq	ess kappa	mean lambda	lambda freq	ess lambda
Allenopithecus_nigroviridis	0.55432	0.44568	none	799999	299380	passed	0.711	219042	passed	0.6671	0.4953	0.7641	19709.2	0.9782	0.2359	23097
Alouatta_belzebul	0.66149	0.33851	none	799999	304534	passed	0.1054	227582	passed	0.2001	0.4877	0.7753	19554	0.9779	0.2247	23083.6
Alouatta_caraya	0.23843	0.76157	none	799999	301720	passed	0.1777	223099	passed	0.2537	0.485	0.7724	19272.8	0.9779	0.2276	22786.5
Alouatta_guariba	0.47162	0.52838	none	799999	300291	passed	0.6634	220596	passed	0.855	0.4925	0.7676	19245.3	0.9781	0.2324	22479.5
Alouatta_palliata	0.48961	0.51039	none	799999	312803	passed	0.4654	230375	passed	0.5434	0.4848	0.7609	19387.9	0.9777	0.2391	22136.5
Alouatta_pigra	0.86601	0.13399	none	799999	333851	passed	0.724	247743	passed	0.935	0.4835	0.751	20383.1	0.9773	0.249	23162.1
Alouatta_seniculus	0.55368	0.44632	none	799999	285745	passed	0.9487	210322	passed	0.5933	0.4835	0.7832	19421.3	0.9779	0.2168	22377.5
Aotus_lemurinus	0.11315	0.88685	none	799999	316321	passed	0.381	229408	passed	0.3073	0.5107	0.7728	18586.3	0.9784	0.2272	21705.6
Aotus_trivirgatus	0.93765	0.062349	none	799999	310917	passed	0.6155	223442	passed	0.5549	0.5042	0.7917	18452.8	0.9783	0.2083	21640.4
Arctocebus_calabarensis	0.42594	0.57406	none	799999	309034	passed	0.1291	233282	passed	0.1404	0.4972	0.7554	19783.9	0.9783	0.2446	23144
Ateles_belzebuth	0.28267	0.71733	none	799999	288142	passed	0.203	211463	passed	0.1207	0.4825	0.7839	18824.5	0.9779	0.2161	22289.3
Ateles_fusciceps	0.61876	0.38124	none	799999	275034	passed	0.6123	206347	passed	0.2616	0.4802	0.7891	18843.6	0.9778	0.2109	22362.8
Ateles_geoffroyi	0.33154	0.66846	none	799999	276630	passed	0.2642	206423	passed	0.0843	0.4804	0.7854	18900.6	0.9776	0.2146	22032.9
Ateles_paniscus	0.60048	0.39952	none	799999	292639	passed	0.3393	208477	passed	0.474	0.4836	0.7825	18913.3	0.9779	0.2175	22780.3
Avahi_laniger	0.95272	0.047278	none	799999	281880	passed	0.6018	212394	passed	0.5748	0.4795	0.8032	18272.2	0.9782	0.1968	21110.3
Bunopithecus_hoolock	0.27553	0.72447	none	799999	302840	passed	0.9748	225081	passed	0.9833	0.4855	0.7699	19259.1	0.9781	0.2301	23545.4
Cacajao_calvus	0.016219	0.98378	positive	799999	302545	passed	0.3551	223059	passed	0.1972	0.4993	0.7542	19884.9	0.9797	0.2458	23395.4
Cacajao_melanocephalus	0.04915	0.95085	none	799999	278657	passed	0.3588	200206	passed	0.4733	0.5406	0.7764	19347.1	0.9815	0.2236	21175.5
Callimico_goeldii	0.37886	0.62114	none	799999	305498	passed	0.2946	226899	passed	0.4264	0.4924	0.7643	19728.2	0.9783	0.2357	23025.8
Callithrix_argentata	0.63519	0.36481	none	799999	292537	passed	0.8253	216958	passed	0.9021	0.4851	0.7771	19455.9	0.9779	0.2229	22498.9
Callithrix_jacchus	0.65405	0.34595	none	799999	289143	passed	0.3675	211459	passed	0.5138	0.479	0.7769	19044.6	0.9775	0.2231	21737
Callithrix_penicillata	0.47426	0.52574	none	799999	311828	passed	0.1727	226610	passed	0.2735	0.4794	0.7754	19325.7	0.9775	0.2246	22462.4
Callithrix_pygmaea	0.4956	0.5044	none	799999	278705	passed	0.1761	202393	passed	0.389	0.4871	0.7767	19392.5	0.978	0.2233	22343.2
Cebus_albifrons	0.44685	0.55315	none	799999	292624	passed	0.1687	224779	passed	0.1744	0.4722	0.7799	19172	0.9774	0.2201	22157.7
Cebus_apella	0.51979	0.48021	none	799999	304957	passed	0.3553	226224	passed	0.7908	0.4926	0.7716	19911.5	0.9779	0.2284	23126.1
Cebus_capucinus	0.19641	0.80359	none	799999	285242	passed	0.1869	211290	passed	0.2661	0.4836	0.7836	19244.8	0.9778	0.2164	21877.8
Cebus_olivaceus	0.58271	0.41729	none	639999	289366	passed	0.2432	211068	passed	0.051	0.4728	0.7814	17367.6	0.9775	0.2186	19583.4
Cebus_xanthosternos	0.22112	0.77888	none	799999	296966	passed	0.3951	224436	passed	0.2229	0.4854	0.7766	19440.9	0.9778	0.2234	21384.5
Cercocebus_torquatus	0.12993	0.87007	none	799999	286582	passed	0.4227	210118	passed	0.6113	0.4784	0.7834	19119.2	0.9776	0.2166	22588
Cercopithecus_albogularis	0.50317	0.49683	none	799999	299896	passed	0.8916	222801	passed	0.7475	0.483	0.7821	19203.7	0.9779	0.2179	22541.1
Cercopithecus_ascanius	0.5613	0.4387	none	799999	296911	passed	0.8559	220339	passed	0.9895	0.4828	0.7769	19162.2	0.9778	0.2231	21389.8
Cercopithecus_campbelli	0.55784	0.44216	none	799999	290531	passed	0.8499	215175	passed	0.7092	0.4819	0.785	19307.8	0.9779	0.215	22768.1
Cercopithecus_cephus	0.29414	0.70586	none	799999	306741	passed	0.1416	227589	passed	0.0847	0.481	0.7691	19653	0.9777	0.2309	22431.4
Cercopithecus_diana	0.72029	0.27971	none	799999	297761	passed	0.5353	220989	passed	0.6331	0.4886	0.768	19614.3	0.978	0.232	21696.7
Cercopithecus_erythrotis	0.33045	0.66955	none	799999	292747	passed	0.6487	220393	passed	0.4996	0.4829	0.7674	19421.7	0.9776	0.2326	22764.6
Cercopithecus_hamlyni	0.36352	0.63648	none	799999	305546	passed	0.8861	225235	passed	0.9764	0.4857	0.7766	19365.5	0.9781	0.2234	22827.2
Cercopithecus_lhoesti	0.22031	0.77969	none	799999	302888	passed	0.3062	220730	passed	0.2685	0.4857	0.7731	19374.4	0.978	0.2269	22587.8
Cercopithecus_mitis	0.63971	0.36029	none	799999	291535	passed	0.5018	213843	passed	0.729	0.4829	0.7803	19100.3	0.9778	0.2197	23451.3
Cercopithecus_mona	0.27535	0.72465	none	799999	295143	passed	0.608	217370	passed	0.7835	0.4823	0.7827	19014.9	0.9778	0.2173	22422.8
Cercopithecus_neglectus	0.68045	0.31955	none	799999	306310	passed	0.9369	234457	passed	0.6979	0.4869	0.7683	19800.1	0.9779	0.2317	20841
Cercopithecus_nictitans	0.48193	0.51807	none	799999	303274	passed	0.6626	218335	passed	0.6869	0.4845	0.7827	18985.1	0.9779	0.2173	20832.8
Cercopithecus_petaurista	0.75185	0.24815	none	799999	305511	passed	0.7885	224221	passed	0.9396	0.486	0.7731	19420.2	0.9782	0.2269	22104.4
Cercopithecus_pogonias	0.55947	0.44053	none	799999	277011	passed	0.6361	212958	passed	0.6952	0.4816	0.7885	19240.6	0.9777	0.2115	22667.9
Cercopithecus_wolfi	0.37962	0.62038	none	799999	292019	passed	0.4791	211123	passed	0.5044	0.4801	0.7889	19009.3	0.9777	0.2111	22037
Cheirogaleus_major	0.31932	0.68068	none	799999	292850	passed	0.1842	223331	passed	0.234	0.4962	0.7582	19703.6	0.9783	0.2418	23069.7
Cheirogaleus_medius	0.84614	0.15386	none	799999	294818	passed	0.2429	218086	passed	0.0894	0.4971	0.7747	19246.7	0.9785	0.2253	22922.1
Chiropotes_satanas	0.99281	0.0071925	negative	799999	309606	passed	0.702	222289	passed	0.3832	0.5657	0.7517	20552.8	0.9834	0.2483	22495.8
Chlorocebus_aethiops	0.17542	0.82458	none	799999	296845	passed	0.5622	217018	passed	0.4302	0.4838	0.7831	19131.7	0.978	0.2169	21970.3
Chlorocebus_pygerythrus	0.77504	0.22496	none	799999	298580	passed	0.158	218141	passed	0.1354	0.4843	0.7848	19377.4	0.9781	0.2152	22360.1
Chlorocebus_sabaeus	0.64034	0.35966	none	799999	292444	passed	0.7095	217742	passed	0.6176	0.4851	0.7869	19339.5	0.978	0.2131	21631.1
Colobus_angolensis	0.4003	0.5997	none	799999	281329	passed	0.2923	204899	passed	0.3175	0.4842	0.7823	18769.2	0.978	0.2177	22447.5
Colobus_guereza	0.48425	0.51575	none	799999	287312	passed	0.8093	216156	passed	0.7168	0.4816	0.7885	19321.5	0.9779	0.2115	22652.6
Colobus_polykomos	0.79809	0.20191	none	319999	210087	passed	0.0787	157457	passed	0.1021	0.4792	0.775	12937.2	0.9777	0.225	15962.2
Colobus_satanas	0.51036	0.48964	none	799999	282105	passed	0.9767	211552	passed	0.9848	0.4871	0.7782	19327	0.9781	0.2218	21924.2
Colobus_vellerosus	0.27049	0.72951	none	799999	291352	passed	0.5574	215792	passed	0.5065	0.4795	0.7779	18914.2	0.9777	0.2221	21770
Daubentonia_madagascariensis	0.02544	0.97456	none	799999	208845	passed	0.7416	165762	passed	0.748	0.4293	0.8563	14405.7	0.9783	0.1437	18822.5
Erythrocebus_patas	0.54988	0.45012	none	799999	287234	passed	0.8853	221331	passed	0.8597	0.4931	0.7679	19457.5	0.9783	0.2321	22405.4
Eulemur_coronatus	0.16467	0.83533	none	799999	290822	passed	0.8587	214441	passed	0.9716	0.4815	0.7801	19168.5	0.978	0.2199	22922.7
Eulemur_mongoz	0.54538	0.45462	none	639999	262811	passed	0.1291	193073	passed	0.1217	0.487	0.778	17430	0.978	0.222	19936
Eulemur_rubriventer	0.53963	0.46037	none	799999	297383	passed	0.2867	217707	passed	0.1797	0.4858	0.7762	19253.1	0.9779	0.2238	22044.2
Euoticus_elegantulus	0.39411	0.60589	none	799999	303337	passed	0.5769	221857	passed	0.2313	0.4928	0.7724	19279.5	0.9782	0.2276	23972.1
Galago_moholi	0.34454	0.65546	none	799999	302504	passed	0.9721	224569	passed	0.9788	0.4817	0.7766	19616.3	0.9777	0.2234	21945.9
Galago_senegalensis	0.77535	0.22465	none	799999	306597	passed	0.8821	220563	passed	0.4692	0.4814	0.7805	19373.2	0.9778	0.2195	22469.1
Gorilla_beringei	0.9989	0.0010963	negative	799999	301921	passed	0.4547	226006	passed	0.7128	0.4508	0.7555	20705.9	0.9738	0.2445	25525.3
Hapalemur_griseus	0.14699	0.85301	none	799999	278224	passed	0.2148	204030	passed	0.3955	0.4789	0.7811	19169.6	0.9777	0.2189	21170.3
Hylobates_agilis	0.44762	0.55238	none	799999	274097	passed	0.2193	204311	passed	0.1766	0.4834	0.7888	18831.6	0.9778	0.2112	22442.4
Hylobates_lar	0.094779	0.90522	none	799999	291825	passed	0.4484	214810	passed	0.4037	0.4829	0.7806	19274.2	0.9781	0.2194	22618
Hylobates_muelleri	0.7981	0.2019	none	799999	297367	passed	0.1592	217625	passed	0.2462	0.4868	0.7766	19361.7	0.978	0.2234	21740
Hylobates_pileatus	0.65783	0.34217	none	799999	285838	passed	0.8389	210653	passed	0.7301	0.486	0.7846	19141	0.9781	0.2154	21665.1
Indri_indri	0.65971	0.34029	none	799999	309726	passed	0.3688	233415	passed	0.5338	0.4975	0.7476	20272.4	0.978	0.2524	23143.9
Lagothrix_lagotricha	0.30338	0.69662	none	799999	304763	passed	0.8445	222795	passed	0.6692	0.496	0.7539	19536.9	0.9783	0.2461	23170.2
Lemur_catta	0.85984	0.14016	none	799999	272645	passed	0.2163	204328	passed	0.3124	0.4714	0.7848	18604.4	0.9778	0.2152	22001.7
Leontopithecus_rosalia	0.55263	0.44737	none	479999	249907	passed	0.0623	190217	passed	0.1316	0.4958	0.7543	16144.6	0.9783	0.2457	17419
Lepilemur_leucopus	0.83188	0.16812	none	799999	288992	passed	0.0695	215880	passed	0.0676	0.4881	0.7624	19387.9	0.9781	0.2376	22322.5
Lophocebus_albigena	0.74978	0.25022	none	799999	288971	passed	0.465	217637	passed	0.447	0.4866	0.7744	19421.2	0.9781	0.2256	21105.7
Lophocebus_aterrimus	0.16692	0.83308	none	799999	303373	passed	0.8207	224298	passed	0.7458	0.4816	0.7825	19112	0.9779	0.2175	22203.5
Loris_lydekkerianus	0.83978	0.16022	none	799999	323070	passed	0.2455	241791	passed	0.1738	0.4964	0.772	19741.9	0.9781	0.228	21002.6
Loris_tardigradus	0.11668	0.88332	none	799999	296862	passed	0.9932	224272	passed	0.9988	0.4844	0.7818	18817.5	0.9779	0.2182	21563.8
Macaca_arctoides	0.75416	0.24584	none	799999	298835	passed	0.3846	230963	passed	0.4076	0.4835	0.7746	19374.9	0.9778	0.2254	22986.1
Macaca_assamensis	0.80853	0.19147	none	319999	227400	passed	0.0745	173663	passed	0.2117	0.4855	0.7673	13966.8	0.9779	0.2327	16312.2
Macaca_fascicularis	0.48732	0.51268	none	799999	286447	passed	0.8696	213062	passed	0.9743	0.4869	0.7796	18973.9	0.9782	0.2204	21684.1
Macaca_fuscata	0.60446	0.39554	none	799999	301136	passed	0.6521	223186	passed	0.758	0.4868	0.7706	19353.5	0.9779	0.2294	22461.5
Macaca_leonina	0.25883	0.74117	none	799999	292811	passed	0.8288	216852	passed	0.9487	0.483	0.7808	19345.5	0.9779	0.2192	21705.3
Macaca_mulatta	0.38676	0.61324	none	799999	299279	passed	0.6351	217674	passed	0.7758	0.4869	0.7839	19035.8	0.9781	0.2161	23209.8
Macaca_nemestrina	0.28933	0.71067	none	799999	283547	passed	0.1281	211274	passed	0.0834	0.4857	0.7774	19141.2	0.9781	0.2226	21928.5
Macaca_nigra	0.26184	0.73816	none	799999	286622	passed	0.1865	213849	passed	0.3136	0.485	0.7784	18974.2	0.9779	0.2216	21977.6
Macaca_radiata	0.34878	0.65122	none	799999	318261	passed	0.9015	238248	passed	0.8097	0.4926	0.7596	20059.6	0.9777	0.2404	23118.6
Macaca_silenus	0.84669	0.15331	none	799999	292853	passed	0.432	213496	passed	0.3501	0.4811	0.7913	18735.2	0.9781	0.2087	21641.8
Macaca_sinica	0.18601	0.81399	none	799999	337211	passed	0.9112	254763	passed	0.4745	0.4834	0.7594	19974.2	0.9775	0.2406	23161.8
Macaca_sylvanus	0.92579	0.074208	none	799999	294210	passed	0.2345	220090	passed	0.2049	0.4743	0.778	19283.3	0.9776	0.222	22378.3
Mandrillus_leucophaeus	0.63125	0.36875	none	799999	281704	passed	0.2724	209878	passed	0.1196	0.4855	0.7806	18934.5	0.9779	0.2194	21853.2
Mandrillus_sphinx	0.53603	0.46397	none	799999	306180	passed	0.6026	226993	passed	0.9221	0.486	0.7805	19604.6	0.9779	0.2195	22728.6
Microcebus_murinus	0.9545	0.045496	none	799999	283605	passed	0.0682	212603	passed	0.2567	0.4837	0.7913	19254.2	0.9784	0.2087	22661.4
Microcebus_rufus	0.076646	0.92335	none	159999	170547	passed	0.0921	123697	passed	0.1814	0.4687	0.7809	11418.7	0.9776	0.2191	12731.1
Mirza_coquereli	0.31012	0.68988	none	799999	303628	passed	0.3172	224395	passed	0.2379	0.4949	0.7693	19546.1	0.9785	0.2307	22200.6
Nasalis_larvatus	0.5816	0.4184	none	479999	247691	passed	0.138	183897	passed	0.0521	0.4934	0.7672	16009.8	0.9782	0.2328	18450.6
Nomascus_gabriellae	0.30725	0.69275	none	799999	296718	passed	0.14	218893	passed	0.1144	0.487	0.7714	19106.3	0.9781	0.2286	22349.4
Nycticebus_coucang	0.45524	0.54476	none	799999	313220	passed	0.6027	238019	passed	0.9252	0.4713	0.7638	19929.7	0.9773	0.2362	22789.7
Otolemur_crassicaudatus	0.97484	0.025155	none	799999	307621	passed	0.6064	235063	passed	0.4242	0.4979	0.7809	19287.7	0.9792	0.2191	21752.6
Otolemur_garnettii	0.035425	0.96457	none	799999	343223	passed	0.7344	260158	passed	0.5967	0.5234	0.7633	20166.6	0.9813	0.2367	22252.5
Pan_paniscus	0.80291	0.19709	none	799999	323125	passed	0.4572	237625	passed	0.3938	0.4946	0.7439	20534.6	0.9779	0.2561	22500.1
Pan_troglodytes_schweinfurthii	0.0052714	0.99473	positive	319999	116811	passed	0.0508	79907.5	passed	0.0569	0.6039	0.8627	8854.67	0.9862	0.1373	8138.77
Pan_troglodytes_troglodytes	0.99631	0.0036863	negative	799999	216773	passed	0.2401	153869	passed	0.363	0.598	0.8252	14341.3	0.9829	0.1748	14589.6
Pan_troglodytes_verus	0.80749	0.19251	none	799999	303154	passed	0.1276	227472	passed	0.2717	0.4802	0.7727	19496.1	0.9774	0.2273	21958.7
Papio_anubis	0.45061	0.54939	none	799999	286745	passed	0.4528	214132	passed	0.1865	0.4797	0.7853	19046.8	0.9776	0.2147	22053.2
Papio_cynocephalus	0.28078	0.71922	none	799999	282755	passed	0.8911	215527	passed	0.9348	0.4815	0.7849	18994.2	0.9779	0.2151	21974.9
Papio_hamadryas	0.33914	0.66086	none	799999	294953	passed	0.0522	220024	passed	0.1262	0.4782	0.7851	19060.8	0.9775	0.2149	22081.5
Papio_papio	0.81231	0.18769	none	799999	289710	passed	0.3311	214902	passed	0.3276	0.4837	0.7821	19089.5	0.9779	0.2179	21146.8
Papio_ursinus	0.42848	0.57152	none	799999	283570	passed	0.4678	209597	passed	0.5268	0.4821	0.7879	18796.7	0.978	0.2121	22361.4
Perodicticus_potto	0.61126	0.38874	none	799999	297143	passed	0.2237	225389	passed	0.1813	0.4959	0.7565	19813.7	0.9783	0.2435	22563
Piliocolobus_badius	0.87871	0.12129	none	799999	300298	passed	0.741	216860	passed	0.9134	0.481	0.7795	19541.6	0.9778	0.2205	22935.8
Piliocolobus_kirkii	0.51338	0.48662	none	799999	300142	passed	0.2775	219010	passed	0.2388	0.4843	0.7801	19087.5	0.9779	0.2199	22225.4
Piliocolobus_tephrosceles	0.36226	0.63774	none	799999	273730	passed	0.8473	209984	passed	0.5132	0.4835	0.7834	19046.7	0.978	0.2166	21655.7
Pithecia_pithecia	0.83136	0.16864	none	799999	313172	passed	0.3578	228690	passed	0.1157	0.5124	0.7519	20169.1	0.9791	0.2481	22959
Pongo_abelii	0.52308	0.47692	none	799999	307571	passed	0.4231	225869	passed	0.4428	0.4922	0.7752	19642.8	0.978	0.2248	22163.1
Pongo_pygmaeus	0.37336	0.62664	none	799999	290934	passed	0.8925	216804	passed	0.6002	0.4861	0.7807	19441.1	0.978	0.2193	22238.4
Presbytis_comata	0.18912	0.81088	none	799999	303465	passed	0.2808	226391	passed	0.5675	0.4881	0.7777	19656.2	0.9782	0.2223	22417.1
Presbytis_melalophos	0.82459	0.17541	none	799999	275899	passed	0.4775	203900	passed	0.2567	0.4849	0.7846	19118.4	0.9782	0.2154	21561.2
Procolobus_verus	0.42724	0.57276	none	639999	278189	passed	0.1982	202591	passed	0.2188	0.494	0.7611	17634.1	0.9783	0.2389	19461
Propithecus_deckenii	0.37127	0.62873	none	799999	296202	passed	0.3128	229927	passed	0.1754	0.4737	0.773	19735.8	0.9774	0.227	22427.5
Propithecus_diadema	0.53119	0.46881	none	799999	290152	passed	0.9259	213228	passed	0.991	0.48	0.7797	19413.2	0.9776	0.2203	21751.7
Propithecus_edwardsi	0.38668	0.61332	none	799999	278965	passed	0.6945	206488	passed	0.723	0.4786	0.7792	19105.9	0.9776	0.2208	22883.5
Propithecus_verreauxi	0.47206	0.52794	none	799999	293598	passed	0.6992	220037	passed	0.6206	0.4745	0.7719	19538.1	0.9773	0.2281	22821.9
Rhinopithecus_roxellana	0.22748	0.77252	none	799999	296734	passed	0.7538	219289	passed	0.9467	0.4932	0.7739	19666.8	0.9783	0.2261	22179.1
Saguinus_fuscicollis	0.84051	0.15949	none	799999	294507	passed	0.4587	222195	passed	0.7794	0.4937	0.7703	19676.3	0.9782	0.2297	22408
Saguinus_geoffroyi	0.69492	0.30508	none	799999	294230	passed	0.1458	216422	passed	0.2524	0.4813	0.7767	19404.1	0.9776	0.2233	22281.1
Saguinus_leucopus	0.72831	0.27169	none	799999	313133	passed	0.7849	225090	passed	0.9492	0.4867	0.7686	19769.4	0.978	0.2314	22740.2
Saguinus_midas	0.95198	0.048021	none	799999	333861	passed	0.7419	245563	passed	0.9139	0.4928	0.7654	20086.7	0.9784	0.2346	24382.4
Saguinus_mystax	0.43979	0.56021	none	799999	296665	passed	0.2586	215025	passed	0.5985	0.4927	0.7678	19141.3	0.9782	0.2322	23426.2
Saguinus_niger	0.053786	0.94621	none	799999	307898	passed	0.3732	226139	passed	0.1107	0.4865	0.7815	19563.7	0.9786	0.2185	21731.8
Saguinus_oedipus	0.28389	0.71611	none	799999	285100	passed	0.3935	217314	passed	0.6625	0.4797	0.7864	18990.5	0.9777	0.2136	21345.6
Saimiri_oerstedii	0.19788	0.80212	none	799999	304443	passed	0.1278	228828	passed	0.2974	0.4821	0.7716	18952.8	0.9776	0.2284	21586
Saimiri_sciureus	0.65534	0.34466	none	479999	246415	passed	0.0769	183213	passed	0.4314	0.4859	0.7715	15514.6	0.978	0.2285	17918.3
Symphalangus_syndactylus	0.8002	0.1998	none	799999	280941	passed	0.696	205518	passed	0.6814	0.4836	0.778	19233	0.9779	0.222	22585.9
Tarsius_bancanus	0.7834	0.2166	none	799999	292867	passed	0.3898	226030	passed	0.6027	0.4988	0.7544	20038.2	0.9782	0.2456	21708.7
Tarsius_syrichta	0.55902	0.44098	none	799999	301814	passed	0.6133	239633	passed	0.8434	0.5136	0.7192	21422.9	0.9783	0.2808	24336.3
Theropithecus_gelada	0.74938	0.25062	none	799999	291692	passed	0.0683	217324	passed	0.0996	0.4836	0.7793	19151.4	0.9779	0.2207	23020.2
Trachypithecus_cristatus	0.65297	0.34703	none	799999	306796	passed	0.2941	217325	passed	0.4826	0.4913	0.7706	19551.4	0.978	0.2294	23106.6
Trachypithecus_geei	0.61562	0.38438	none	799999	297448	passed	0.8165	219428	passed	0.6075	0.4894	0.7765	19468.9	0.978	0.2235	22465.7
Trachypithecus_johnii	0.78703	0.21297	none	799999	297721	passed	0.2337	224058	passed	0.3737	0.483	0.7778	19691.8	0.9778	0.2222	22934.4
Trachypithecus_obscurus	0.64758	0.35242	none	799999	305552	passed	0.2214	227222	passed	0.1994	0.4908	0.7707	19800.8	0.978	0.2293	23642.5
Trachypithecus_phayrei	0.34107	0.65893	none	799999	293105	passed	0.535	222821	passed	0.8329	0.4916	0.7735	19628.5	0.9782	0.2265	22541.3
Trachypithecus_vetulus	0.23302	0.76698	none	799999	291792	passed	0.228	218704	passed	0.2381	0.4804	0.7814	19335.5	0.9778	0.2186	21876.4
Homo_sapiens	0.001045	0.99895	positive	799999	259111	passed	0.985	190312	passed	0.9847	0.5555	0.2544	29385.1	0.9644	0.7456	20715
Homo_sapiens_neanderthalensis	0.1385	0.8615	none	799999	268196	passed	0.8692	199292	passed	0.7804	0.5835	0.2875	27773.4	0.9678	0.7125	19350.1

## Sheet: ECV~body mass (humans excluded)
species	% preds higher than observed	% preds lower than observed	outlier status	run length	ess intercept	intercept stationarity test	p-value	ess coef predictor	coef predictor stationarity test	p-value	mean kappa	kappa freq	ess kappa	mean lambda	lambda freq	ess lambda
Allenopithecus_nigroviridis	0.56588	0.43412	none	799999	262410	passed	0.5468	198279	passed	0.6514	0.5652	0.2569	27830.7	0.9649	0.7431	20237.9
Alouatta_belzebul	0.67113	0.32887	none	799999	264095	passed	0.2923	184674	passed	0.3087	0.554	0.2559	28314	0.9638	0.7441	19663.9
Alouatta_caraya	0.20729	0.79271	none	799999	249155	passed	0.6425	182458	passed	0.5473	0.5536	0.2523	29522.4	0.9642	0.7477	20151
Alouatta_guariba	0.41971	0.58029	none	799999	257018	passed	0.7507	185738	passed	0.4222	0.5629	0.2559	29906.6	0.9642	0.7441	19688.9
Alouatta_palliata	0.56945	0.43055	none	799999	251703	passed	0.3677	180258	passed	0.6795	0.5534	0.2373	28078.5	0.9632	0.7627	20004.7
Alouatta_pigra	0.90248	0.097522	none	639999	206852	passed	0.0989	148707	passed	0.0651	0.5529	0.219	24726.1	0.9625	0.781	17581.9
Alouatta_seniculus	0.50929	0.49071	none	799999	268874	passed	0.9716	197999	passed	0.9868	0.5527	0.2632	29550.6	0.964	0.7368	20539.6
Aotus_lemurinus	0.14646	0.85354	none	799999	282261	passed	0.552	209490	passed	0.3513	0.5824	0.2836	28709.7	0.965	0.7164	20134.6
Aotus_trivirgatus	0.91925	0.080749	none	799999	309223	passed	0.976	230461	passed	0.9494	0.579	0.2955	29677.9	0.9645	0.7045	20469.2
Arctocebus_calabarensis	0.42128	0.57872	none	799999	255040	passed	0.9567	188579	passed	0.9649	0.5663	0.2467	28813.5	0.9647	0.7533	19789.6
Ateles_belzebuth	0.27655	0.72345	none	799999	256061	passed	0.5042	187690	passed	0.6009	0.5525	0.2613	29112.7	0.9636	0.7387	19921.2
Ateles_fusciceps	0.60158	0.39842	none	799999	266723	passed	0.5162	193947	passed	0.6474	0.5508	0.2663	29855.4	0.9635	0.7337	20410.6
Ateles_geoffroyi	0.3148	0.6852	none	799999	271185	passed	0.6512	194127	passed	0.5093	0.5509	0.2611	28744.9	0.9633	0.7389	20234
Ateles_paniscus	0.60391	0.39609	none	799999	260436	passed	0.5969	193615	passed	0.8695	0.5527	0.2642	30235.6	0.964	0.7358	20676
Avahi_laniger	0.9418	0.058201	none	799999	291084	passed	0.4736	212152	passed	0.2747	0.5524	0.2835	29550.3	0.9642	0.7165	20843.7
Bunopithecus_hoolock	0.26449	0.73551	none	479999	207176	passed	0.0882	149721	passed	0.236	0.5536	0.254	21711.6	0.9643	0.746	15799.9
Cacajao_calvus	0.013555	0.98645	positive	479999	199146	passed	0.2018	144030	passed	0.3839	0.5608	0.2406	22109.1	0.9669	0.7594	16121.3
Cacajao_melanocephalus	0.044266	0.95573	none	799999	262476	passed	0.7795	184289	passed	0.8173	0.6097	0.2759	27090.8	0.9698	0.7241	19651.7
Callimico_goeldii	0.42539	0.57461	none	159999	154129	passed	0.2454	114399	passed	0.0867	0.5641	0.2546	18128.1	0.9651	0.7454	12324.7
Callithrix_argentata	0.66488	0.33512	none	799999	270084	passed	0.9831	198293	passed	0.9788	0.5537	0.2573	30258.8	0.9637	0.7427	20223.7
Callithrix_jacchus	0.66902	0.33098	none	799999	249982	passed	0.1761	182560	passed	0.4599	0.5497	0.2461	29741.2	0.963	0.7539	20104
Callithrix_penicillata	0.4963	0.5037	none	799999	261502	passed	0.7814	186552	passed	0.9386	0.5495	0.2472	28712.3	0.9631	0.7528	20460.9
Callithrix_pygmaea	0.4962	0.5038	none	799999	258730	passed	0.1941	191907	passed	0.1391	0.555	0.2629	28235.4	0.9642	0.7371	20504.7
Cebus_albifrons	0.43621	0.56379	none	799999	258521	passed	0.9175	186558	passed	0.9573	0.5415	0.2465	28426.2	0.9628	0.7535	20297.8
Cebus_apella	0.49546	0.50454	none	799999	275865	passed	0.7463	192901	passed	0.8198	0.564	0.2553	27221.3	0.9641	0.7447	20699
Cebus_capucinus	0.19036	0.80964	none	799999	269894	passed	0.4589	199318	passed	0.4826	0.5522	0.2618	29080.7	0.9634	0.7382	20287.2
Cebus_olivaceus	0.57208	0.42792	none	799999	255054	passed	0.4397	184341	passed	0.6021	0.549	0.2516	28902.6	0.9632	0.7484	19447.2
Cebus_xanthosternos	0.20533	0.79467	none	799999	255035	passed	0.5495	189131	passed	0.516	0.5535	0.2535	29474.9	0.9636	0.7465	20667.8
Cercocebus_torquatus	0.11979	0.88021	none	799999	262820	passed	0.6047	196858	passed	0.8138	0.5497	0.2537	30188.1	0.9635	0.7463	20579.7
Cercopithecus_albogularis	0.53023	0.46977	none	799999	264474	passed	0.5233	199538	passed	0.2366	0.5526	0.2639	29174.9	0.9638	0.7361	20689.6
Cercopithecus_ascanius	0.55878	0.44122	none	799999	257881	passed	0.3537	191053	passed	0.4299	0.5525	0.2575	29047.8	0.9637	0.7425	20184
Cercopithecus_campbelli	0.52793	0.47207	none	799999	272676	passed	0.1573	198351	passed	0.2253	0.5525	0.2655	29455.5	0.9636	0.7345	20462.6
Cercopithecus_cephus	0.24962	0.75038	none	639999	226452	passed	0.079	170432	passed	0.1494	0.5511	0.2393	25263.5	0.9633	0.7607	18275.1
Cercopithecus_diana	0.75063	0.24937	none	799999	257531	passed	0.9537	185600	passed	0.8161	0.5557	0.2513	27337.9	0.9642	0.7487	20117.7
Cercopithecus_erythrotis	0.28214	0.71786	none	799999	255352	passed	0.9136	184727	passed	0.8251	0.5515	0.2404	27760.1	0.9632	0.7596	19985.9
Cercopithecus_hamlyni	0.37851	0.62149	none	799999	272682	passed	0.127	196715	passed	0.0559	0.5549	0.265	29226.7	0.9645	0.735	20769.7
Cercopithecus_lhoesti	0.21149	0.78851	none	799999	263986	passed	0.551	192750	passed	0.5972	0.5537	0.2571	27689.7	0.9641	0.7429	20496.8
Cercopithecus_mitis	0.66669	0.33331	none	799999	258719	passed	0.9201	193495	passed	0.9466	0.5521	0.2589	29486.8	0.9637	0.7411	20050.4
Cercopithecus_mona	0.25702	0.74298	none	799999	265717	passed	0.7976	192463	passed	0.8716	0.5516	0.2606	29541.2	0.9636	0.7394	20124.2
Cercopithecus_neglectus	0.71552	0.28448	none	799999	254210	passed	0.4736	182583	passed	0.5173	0.5554	0.2494	28915.4	0.964	0.7506	19644.2
Cercopithecus_nictitans	0.50039	0.49961	none	799999	273115	passed	0.7555	201942	passed	0.9065	0.5541	0.2667	29192.5	0.964	0.7333	20504.6
Cercopithecus_petaurista	0.77407	0.22593	none	799999	258689	passed	0.2395	196432	passed	0.3498	0.5544	0.2578	28447.4	0.9644	0.7422	20176.9
Cercopithecus_pogonias	0.54437	0.45563	none	319999	187042	passed	0.188	137101	passed	0.0646	0.5519	0.2658	20929.4	0.9635	0.7342	14193.2
Cercopithecus_wolfi	0.37162	0.62838	none	799999	268310	passed	0.6151	196113	passed	0.8478	0.5513	0.2663	29728.9	0.9637	0.7337	20565.6
Cheirogaleus_major	0.36017	0.63983	none	799999	261860	passed	0.2679	189470	passed	0.1464	0.5657	0.2511	28304.1	0.9663	0.7489	20294.6
Cheirogaleus_medius	0.83321	0.16679	none	799999	274695	passed	0.561	194827	passed	0.7035	0.5662	0.2681	29055.8	0.9664	0.7319	20609.4
Chiropotes_satanas	0.99405	0.0059488	negative	799999	277465	passed	0.5275	205620	passed	0.6069	0.6363	0.2911	27959.8	0.9757	0.7089	19985.3
Chlorocebus_aethiops	0.17082	0.82918	none	799999	281039	passed	0.7287	206501	passed	0.5664	0.5524	0.2655	28814.2	0.9642	0.7345	20500.7
Chlorocebus_pygerythrus	0.76655	0.23345	none	799999	279752	passed	0.9019	202943	passed	0.5441	0.5533	0.267	29758	0.9644	0.733	20634.9
Chlorocebus_sabaeus	0.64195	0.35805	none	799999	261932	passed	0.4056	192943	passed	0.6169	0.5535	0.2709	29261.2	0.9642	0.7291	19772.1
Colobus_angolensis	0.38978	0.61022	none	639999	247313	passed	0.1976	180211	passed	0.0646	0.5535	0.2668	26350.7	0.9641	0.7332	18446.5
Colobus_guereza	0.4826	0.5174	none	799999	276443	passed	0.123	198571	passed	0.1907	0.5525	0.2693	29064.4	0.9637	0.7307	20618.1
Colobus_polykomos	0.78947	0.21053	none	799999	266687	passed	0.105	193796	passed	0.3275	0.5509	0.2486	29231.8	0.9633	0.7514	20051.4
Colobus_satanas	0.49965	0.50035	none	799999	271811	passed	0.2208	200105	passed	0.1081	0.5552	0.2671	29493.4	0.9644	0.7329	20683.6
Colobus_vellerosus	0.31431	0.68569	none	799999	258560	passed	0.3569	189356	passed	0.4999	0.5505	0.2526	29405.9	0.9633	0.7474	20514.4
Daubentonia_madagascariensis	0.058715	0.94128	none	799999	330306	passed	0.4498	244649	passed	0.5719	0.5229	0.3442	29366.6	0.9644	0.6558	21876.3
Erythrocebus_patas	0.52944	0.47056	none	799999	270987	passed	0.4059	192760	passed	0.3931	0.5633	0.2586	29302.5	0.9646	0.7414	20171.5
Eulemur_coronatus	0.16309	0.83691	none	799999	267787	passed	0.1078	196296	passed	0.0639	0.5516	0.2581	28552.5	0.9637	0.7419	19634.6
Eulemur_mongoz	0.53892	0.46108	none	799999	261992	passed	0.5377	193324	passed	0.5226	0.554	0.2627	29264.5	0.9642	0.7373	20768.2
Eulemur_rubriventer	0.5476	0.4524	none	799999	258223	passed	0.7539	196328	passed	0.8438	0.5537	0.2621	29148.8	0.9641	0.7379	20217.3
Euoticus_elegantulus	0.37879	0.62121	none	799999	262970	passed	0.5471	193468	passed	0.6574	0.5558	0.2592	29185.1	0.9644	0.7408	20491
Galago_moholi	0.34075	0.65925	none	799999	265344	passed	0.6286	193987	passed	0.3284	0.5517	0.2522	29084.5	0.9636	0.7478	20208.7
Galago_senegalensis	0.7757	0.2243	none	799999	278008	passed	0.1062	201364	passed	0.2435	0.5517	0.2585	29651.2	0.9637	0.7415	20647.8
Gorilla_beringei	0.99786	0.0021363	negative	799999	314500	passed	0.7749	231229	passed	0.8487	0.5079	0.2728	30081.3	0.9624	0.7272	23055.3
Hapalemur_griseus	0.15043	0.84957	none	799999	266445	passed	0.0571	196389	passed	0.2022	0.5499	0.2537	28634.4	0.9634	0.7463	20642.4
Hylobates_agilis	0.47816	0.52184	none	799999	277349	passed	0.854	201020	passed	0.8211	0.5514	0.2689	29687.4	0.9635	0.7311	20333.9
Hylobates_klossii	0.6665	0.3335	none	799999	269825	passed	0.6688	195968	passed	0.456	0.5519	0.2653	29136.1	0.9639	0.7347	20046
Hylobates_lar	0.091852	0.90815	none	479999	224561	passed	0.1009	163878	passed	0.1438	0.5527	0.2588	24871.2	0.9646	0.7412	17134.9
Hylobates_muelleri	0.80485	0.19515	none	799999	260574	passed	0.7342	192129	passed	0.8258	0.5536	0.2583	29464.9	0.9642	0.7417	19989.3
Hylobates_pileatus	0.64445	0.35555	none	799999	272941	passed	0.7586	202243	passed	0.5936	0.553	0.2692	28867.4	0.9642	0.7308	20677.5
Indri_indri	0.68515	0.31485	none	799999	240141	passed	0.3582	174690	passed	0.7825	0.5651	0.237	27858.9	0.9638	0.763	19570.3
Lagothrix_lagotricha	0.30792	0.69208	none	799999	265645	passed	0.4394	189272	passed	0.5801	0.5655	0.2473	28563.4	0.965	0.7527	20291.9
Lemur_catta	0.84979	0.15021	none	799999	273049	passed	0.12	196191	passed	0.4143	0.5407	0.2565	29861.4	0.9637	0.7435	20937.6
Leontopithecus_rosalia	0.57803	0.42197	none	799999	255822	passed	0.3171	181639	passed	0.1785	0.5656	0.2466	28190.2	0.9649	0.7534	19977
Lepilemur_leucopus	0.80955	0.19045	none	799999	256800	passed	0.1728	184471	passed	0.1577	0.555	0.2456	29127.3	0.9646	0.7544	20117.2
Lophocebus_albigena	0.72672	0.27328	none	799999	266068	passed	0.1442	192166	passed	0.3478	0.5633	0.2624	28348	0.9641	0.7376	19979
Lophocebus_aterrimus	0.17147	0.82853	none	799999	266189	passed	0.3808	195774	passed	0.4551	0.5514	0.2601	29786.2	0.9637	0.7399	20181.8
Loris_lydekkerianus	0.83157	0.16843	none	799999	276046	passed	0.6293	199663	passed	0.9515	0.5649	0.2629	29406.2	0.9645	0.7371	19733
Loris_tardigradus	0.12483	0.87517	none	799999	274913	passed	0.2138	200628	passed	0.2217	0.5524	0.2631	29065.1	0.964	0.7369	20588.3
Macaca_arctoides	0.78822	0.21178	none	799999	266625	passed	0.3088	195148	passed	0.3193	0.5518	0.2511	28357.8	0.9637	0.7489	20238.9
Macaca_assamensis	0.82804	0.17196	none	799999	267265	passed	0.3377	197081	passed	0.3872	0.5542	0.2476	28608.8	0.9643	0.7524	20929.6
Macaca_fascicularis	0.48843	0.51157	none	799999	256717	passed	0.2736	187978	passed	0.295	0.5546	0.2664	29986	0.9644	0.7336	20300.4
Macaca_fuscata	0.63771	0.36229	none	799999	267456	passed	0.4104	194692	passed	0.5303	0.5548	0.2531	28395.7	0.9643	0.7469	20169.3
Macaca_leonina	0.25719	0.74281	none	799999	276619	passed	0.425	198489	passed	0.2668	0.552	0.2605	30513	0.9638	0.7395	20183.8
Macaca_mulatta	0.40624	0.59376	none	799999	277820	passed	0.5208	204715	passed	0.6549	0.5547	0.2705	29699.5	0.9643	0.7295	20530.1
Macaca_nemestrina	0.27518	0.72482	none	799999	262939	passed	0.7551	193581	passed	0.6307	0.5542	0.2627	28693.2	0.9641	0.7373	20196.9
Macaca_nigra	0.25384	0.74616	none	799999	274603	passed	0.1426	200765	passed	0.4215	0.5529	0.2612	29258.2	0.9643	0.7388	20413
Macaca_radiata	0.30087	0.69913	none	799999	233903	passed	0.9729	173657	passed	0.9583	0.5627	0.2385	27973.8	0.9634	0.7615	19857.2
Macaca_silenus	0.83811	0.16189	none	799999	284602	passed	0.2253	209932	passed	0.2606	0.5522	0.2763	30272.2	0.9646	0.7237	20661.3
Macaca_sinica	0.14966	0.85034	none	799999	257508	passed	0.7323	185063	passed	0.6303	0.5527	0.231	28840.1	0.9631	0.769	20440
Macaca_sylvanus	0.93545	0.06455	none	799999	266232	passed	0.2144	192071	passed	0.5093	0.5496	0.2422	28830.2	0.9629	0.7578	20596.7
Mandrillus_leucophaeus	0.63877	0.36123	none	799999	258024	passed	0.2699	188382	passed	0.4646	0.5539	0.2629	28982.8	0.9639	0.7371	19996.5
Mandrillus_sphinx	0.54762	0.45238	none	799999	265178	passed	0.71	194544	passed	0.9448	0.5539	0.2611	29077.1	0.964	0.7389	20445.5
Microcebus_murinus	0.94973	0.050269	none	799999	291284	passed	0.3639	214914	passed	0.4135	0.553	0.2734	29446.1	0.9651	0.7266	20882.8
Microcebus_rufus	0.076616	0.92338	none	799999	249058	passed	0.4632	180864	passed	0.4557	0.5388	0.2447	29347.5	0.9629	0.7553	20212.8
Mirza_coquereli	0.34635	0.65365	none	799999	262578	passed	0.2154	186678	passed	0.1058	0.5653	0.2606	29225.4	0.9664	0.7394	20502.1
Nasalis_larvatus	0.55005	0.44995	none	799999	251642	passed	0.7426	188951	passed	0.7675	0.5642	0.2583	30090.2	0.9649	0.7417	19897.8
Nomascus_gabriellae	0.29859	0.70141	none	799999	262045	passed	0.7947	191635	passed	0.9009	0.555	0.2558	28450.3	0.9644	0.7442	20086.1
Nycticebus_bengalensis	0.61642	0.38358	none	799999	237170	passed	0.6255	172425	passed	0.6342	0.5386	0.2263	26992.4	0.9623	0.7737	19478.1
Nycticebus_coucang	0.44245	0.55755	none	799999	240200	passed	0.3137	173913	passed	0.1085	0.5401	0.2232	28412.6	0.9625	0.7768	19839.8
Otolemur_crassicaudatus	0.97287	0.027133	none	799999	307549	passed	0.4611	225682	passed	0.3255	0.5681	0.2891	29655.5	0.9678	0.7109	19828.3
Otolemur_garnettii	0.037505	0.96249	none	799999	296850	passed	0.8373	216387	passed	0.7637	0.584	0.2823	29615.3	0.9691	0.7177	19591.8
Pan_paniscus	0.72682	0.27318	none	799999	235783	passed	0.7735	172792	passed	0.8434	0.5646	0.241	28496.9	0.9641	0.759	19691.9
Pan_troglodytes_schweinfurthii	0.011894	0.98811	positive	799999	339893	passed	0.4107	261779	passed	0.9621	0.6945	0.554	18433.2	0.9764	0.446	16487.7
Pan_troglodytes_troglodytes	0.99324	0.006757	negative	639999	312448	passed	0.127	238693	passed	0.0997	0.6819	0.4934	18927.7	0.9728	0.5066	16321.3
Pan_troglodytes_verus	0.80858	0.19142	none	799999	266811	passed	0.3391	190682	passed	0.6188	0.5503	0.2513	28116.2	0.9632	0.7487	20014.9
Papio_anubis	0.44139	0.55861	none	639999	234774	passed	0.0518	172527	passed	0.0887	0.5502	0.2599	26330.5	0.9634	0.7401	18162.8
Papio_cynocephalus	0.27718	0.72282	none	799999	281223	passed	0.8859	206172	passed	0.9334	0.5519	0.2645	28673.9	0.9638	0.7355	20809.6
Papio_hamadryas	0.31922	0.68078	none	799999	270826	passed	0.9266	201094	passed	0.9689	0.5499	0.2572	30130.2	0.9632	0.7428	20705.1
Papio_papio	0.81376	0.18624	none	799999	265339	passed	0.1812	189917	passed	0.1449	0.5534	0.266	29265.9	0.9645	0.734	20500.3
Papio_ursinus	0.4414	0.5586	none	799999	266808	passed	0.8765	193473	passed	0.9532	0.5522	0.2703	28819.2	0.9639	0.7297	20439.2
Perodicticus_potto	0.60574	0.39426	none	799999	251417	passed	0.6305	187148	passed	0.5468	0.566	0.2489	29191.1	0.9647	0.7511	20253.8
Piliocolobus_badius	0.88898	0.11102	none	799999	261163	passed	0.4485	186034	passed	0.4964	0.5516	0.2542	29259.6	0.9637	0.7458	20282.7
Piliocolobus_kirkii	0.51527	0.48473	none	799999	277038	passed	0.2014	201240	passed	0.2101	0.553	0.2632	28213	0.964	0.7368	20446.7
Piliocolobus_tephrosceles	0.37543	0.62457	none	799999	275937	passed	0.607	202496	passed	0.7408	0.5534	0.2655	29536.8	0.964	0.7345	21083.3
Pongo_abelii	0.53054	0.46946	none	799999	273495	passed	0.1965	190929	passed	0.2637	0.5544	0.2589	28872	0.9641	0.7411	20471.9
Pongo_pygmaeus	0.37942	0.62058	none	799999	260700	passed	0.7801	189874	passed	0.3831	0.5543	0.263	28265	0.9643	0.737	19745.1
Presbytis_comata	0.19077	0.80923	none	799999	259758	passed	0.709	193228	passed	0.5287	0.5548	0.2652	29124.5	0.9648	0.7348	20755.6
Presbytis_melalophos	0.81055	0.18945	none	799999	288669	passed	0.938	214684	passed	0.9556	0.5534	0.2719	29208.9	0.9646	0.7281	21433.5
Procolobus_verus	0.4387	0.5613	none	799999	255992	passed	0.8302	186702	passed	0.7376	0.5649	0.255	28291.6	0.9649	0.745	20325.2
Propithecus_deckenii	0.37723	0.62277	none	799999	254689	passed	0.1903	182102	passed	0.428	0.5487	0.2408	28367.7	0.9628	0.7592	19634.8
Propithecus_diadema	0.54432	0.45568	none	799999	255690	passed	0.2489	191000	passed	0.3559	0.55	0.2508	28999.1	0.9632	0.7492	20178.8
Propithecus_edwardsi	0.40199	0.59801	none	799999	260435	passed	0.4247	190735	passed	0.3861	0.55	0.2547	28596	0.9632	0.7453	20259.2
Propithecus_verreauxi	0.45849	0.54151	none	639999	217721	passed	0.1119	156524	passed	0.0726	0.5482	0.238	25662.4	0.9627	0.762	17946.7
Rhinopithecus_roxellana	0.23245	0.76755	none	799999	272549	passed	0.1046	197632	passed	0.2794	0.5632	0.2647	29140.2	0.9648	0.7353	20415.6
Saguinus_fuscicollis	0.83069	0.16931	none	799999	257443	passed	0.2354	185826	passed	0.2706	0.5632	0.2577	28677.5	0.9645	0.7423	20311
Saguinus_geoffroyi	0.71047	0.28953	none	799999	265665	passed	0.899	194160	passed	0.9077	0.5523	0.2525	28500.5	0.9637	0.7475	19734.5
Saguinus_leucopus	0.75533	0.24467	none	799999	261661	passed	0.9108	194587	passed	0.9442	0.5546	0.2511	29225.2	0.9643	0.7489	19951
Saguinus_midas	0.95741	0.042588	none	799999	286296	passed	0.3144	205953	passed	0.2286	0.5636	0.2496	30229.9	0.9665	0.7504	20587.9
Saguinus_mystax	0.47059	0.52941	none	799999	253543	passed	0.8568	187355	passed	0.8558	0.5635	0.2585	29654.8	0.9646	0.7415	19978.2
Saguinus_niger	0.05595	0.94405	none	799999	296261	passed	0.2067	227621	passed	0.3851	0.5542	0.2699	30170.7	0.9672	0.7301	20373.5
Saguinus_oedipus	0.30086	0.69914	none	799999	266738	passed	0.3131	197184	passed	0.2799	0.5505	0.2625	29335.9	0.9636	0.7375	20484.9
Saimiri_oerstedii	0.17678	0.82322	none	799999	239231	passed	0.7175	176225	passed	0.8801	0.5522	0.2433	28903.3	0.9631	0.7567	19712
Saimiri_sciureus	0.62751	0.37249	none	799999	261704	passed	0.6123	193739	passed	0.6177	0.5534	0.2537	28849.1	0.9639	0.7463	20350.4
Symphalangus_syndactylus	0.80189	0.19811	none	799999	262578	passed	0.6543	192778	passed	0.7564	0.5524	0.2588	29691.2	0.9638	0.7412	20247.3
Tarsius_bancanus	0.73705	0.26295	none	799999	262069	passed	0.2491	193203	passed	0.1803	0.5669	0.2498	28260.3	0.9648	0.7502	20156.3
Tarsius_syrichta	0.52004	0.47996	none	799999	241485	passed	0.5717	167022	passed	0.7133	0.58	0.2262	28289.1	0.9648	0.7738	19620.4
Theropithecus_gelada	0.76306	0.23694	none	799999	269086	passed	0.5078	199661	passed	0.6157	0.5529	0.259	29390.2	0.9641	0.741	20604.1
Trachypithecus_cristatus	0.67867	0.32133	none	799999	259700	passed	0.6601	193097	passed	0.6076	0.5626	0.2562	28295	0.9642	0.7438	20288.3
Trachypithecus_geei	0.6285	0.3715	none	799999	267403	passed	0.5472	193060	passed	0.2866	0.5533	0.2577	28833.1	0.9639	0.7423	20420.2
Trachypithecus_johnii	0.80424	0.19576	none	799999	258293	passed	0.191	186879	passed	0.144	0.5515	0.2512	29705.4	0.9637	0.7488	20144.9
Trachypithecus_obscurus	0.67669	0.32331	none	799999	255069	passed	0.2134	187891	passed	0.2013	0.5552	0.2517	28782	0.9639	0.7483	19974.3
Trachypithecus_phayrei	0.34354	0.65646	none	799999	271011	passed	0.7466	192543	passed	0.2722	0.5633	0.2632	28879.4	0.9646	0.7368	20175
Trachypithecus_vetulus	0.22828	0.77172	none	799999	273685	passed	0.3668	199127	passed	0.4456	0.5515	0.2593	29944.3	0.9639	0.7407	20566
Homo_sapiens_neanderthalensis	0	1	positive	799999	275724	passed	0.5629	202117	passed	0.7226	0.4759	0.1924	30236.6	0.9617	0.8076	25732

## Sheet: ECV
Species	% preds higher than observed	% preds lower than observed	outlier status	run length	ess intercept	intercept stationarity test	p-value	ess coef predictor	coef predictor stationarity test	p-value	mean lambda	lambda freq	ess lambda	mean kappa	kappa freq	ess kappa
Allenopithecus_nigroviridis	0.7788	0.2212	none	799999	799999	passed	0.5444	798514	passed	0.2153	0.9693	0.7091	5428.31	0.9979	0.2909	6524.71
Alouatta_belzebul	0.49187	0.50813	none	799999	799999	passed	0.2538	799999	passed	0.4569	0.9684	0.7172	5418.18	0.9979	0.2828	6079.86
Alouatta_caraya	0.56448	0.43552	none	799999	799999	passed	0.7264	803385	passed	0.8591	0.9683	0.7153	5267.09	0.9978	0.2847	6250.13
Alouatta_guariba	0.53485	0.46515	none	799999	799999	passed	0.8766	799999	passed	0.5714	0.9687	0.7139	5091.86	0.9978	0.2861	6299.03
Alouatta_palliata	0.58559	0.41441	none	799999	799999	passed	0.6369	799999	passed	0.5459	0.9671	0.7122	5291.86	0.9979	0.2878	6764.94
Alouatta_pigra	0.50067	0.49933	none	799999	799999	passed	0.409	799999	passed	0.8007	0.9684	0.7071	5190.39	0.9978	0.2929	6512.76
Alouatta_sara	0.31306	0.68694	none	799999	799999	passed	0.9309	806923	passed	0.9428	0.969	0.7216	5673.95	0.9979	0.2784	6254.5
Alouatta_seniculus	0.50251	0.49749	none	799999	799999	passed	0.9312	799999	passed	0.5053	0.9682	0.7161	5389.47	0.9978	0.2839	6703.56
Aotus_lemurinus	0.67106	0.32894	none	799999	792261	passed	0.5805	799999	passed	0.1912	0.9691	0.6842	5515.76	0.9976	0.3158	7320.18
Aotus_trivirgatus	0.388	0.612	none	799999	799999	passed	0.24	799999	passed	0.9676	0.9689	0.6799	5349.88	0.9976	0.3201	6978.75
Arctocebus_aureus	0.87752	0.12248	none	799999	799999	passed	0.9593	802580	passed	0.9157	0.9684	0.7313	5521.96	0.9979	0.2687	6747.17
Arctocebus_calabarensis	0.18635	0.81365	none	799999	799999	passed	0.4805	799999	passed	0.8045	0.9706	0.6858	5227.34	0.998	0.3142	6493.5
Ateles_belzebuth	0.26709	0.73291	none	799999	802757	passed	0.8806	792528	passed	0.7518	0.9682	0.7128	5314.77	0.9978	0.2872	6342.54
Ateles_fusciceps	0.32082	0.67918	none	799999	799999	passed	0.0884	797287	passed	0.8534	0.9683	0.7145	5201.49	0.9978	0.2855	6597.54
Ateles_geoffroyi	0.59662	0.40338	none	799999	799999	passed	0.1343	807184	passed	0.0579	0.9681	0.7105	5285.39	0.9978	0.2895	6392.13
Ateles_paniscus	0.54595	0.45405	none	799999	799999	passed	0.8372	803038	passed	0.9227	0.9686	0.714	5290.3	0.9978	0.286	6582.18
Avahi_laniger	0.95206	0.047942	none	799999	799999	passed	0.7292	799999	passed	0.5612	0.9675	0.7242	5407.02	0.9978	0.2758	6570.08
Bunopithecus_hoolock	0.54654	0.45346	none	799999	803800	passed	0.5829	799999	passed	0.5275	0.9699	0.6801	5509.48	0.9979	0.3199	6451.16
Cacajao_calvus	0.058035	0.94197	none	799999	804066	passed	0.3705	799999	passed	0.77	0.9688	0.726	5858.27	0.9979	0.274	6573.9
Cacajao_melanocephalus	0.13273	0.86727	none	799999	799999	passed	0.3627	799999	passed	0.8008	0.9734	0.6273	5210.06	0.9982	0.3727	6318.65
Callimico_goeldii	0.54914	0.45086	none	639999	714634	passed	0.2078	724317	passed	0.7844	0.9713	0.665	4580.87	0.9979	0.335	6316.17
Callithrix_argentata	0.19426	0.80574	none	799999	802483	passed	0.0535	802746	passed	0.6476	0.9713	0.6663	5282.86	0.9979	0.3337	7129.51
Callithrix_jacchus	0.54777	0.45223	none	799999	799999	passed	0.4607	799999	passed	0.9111	0.9681	0.7075	5170.71	0.9978	0.2925	6548.36
Callithrix_penicillata	0.4971	0.5029	none	799999	799999	passed	0.7732	799999	passed	0.5761	0.968	0.7077	5103.86	0.9978	0.2923	5743.32
Callithrix_pygmaea	0.99198	0.0080218	negative	799999	799999	passed	0.8792	799999	passed	0.3396	0.9692	0.7079	5354.83	0.9978	0.2921	6685.13
Cebus_albifrons	0.66997	0.33003	none	799999	799999	passed	0.8881	799999	passed	0.681	0.9681	0.7044	5407.85	0.9978	0.2956	7323.41
Cebus_apella	0.37978	0.62022	none	799999	799999	passed	0.43	799999	passed	0.3619	0.9685	0.7119	5359.26	0.9978	0.2881	6386.27
Cebus_capucinus	0.28152	0.71848	none	799999	805521	passed	0.6259	799999	passed	0.2157	0.9684	0.7172	5198.41	0.9978	0.2828	6666.7
Cebus_olivaceus	0.33086	0.66914	none	799999	804203	passed	0.5301	799999	passed	0.4395	0.9675	0.7038	5011.04	0.9978	0.2962	6749.03
Cebus_xanthosternos	0.39875	0.60125	none	799999	799999	passed	0.3344	791808	passed	0.3402	0.9683	0.7167	6065.56	0.9978	0.2833	6534.44
Cercocebus_torquatus	0.75412	0.24588	none	799999	797389	passed	0.8228	799999	passed	0.9335	0.9691	0.7135	5195.45	0.9979	0.2865	6547.26
Cercopithecus_albogularis	0.49203	0.50797	none	319999	559999	passed	0.1515	559999	passed	0.0623	0.968	0.7084	3654.54	0.9979	0.2916	4765.75
Cercopithecus_ascanius	0.60929	0.39071	none	799999	799999	passed	0.2628	799999	passed	0.4442	0.9691	0.7128	5741.21	0.9978	0.2872	6778.59
Cercopithecus_campbelli	0.64935	0.35065	none	799999	799999	passed	0.0564	783325	passed	0.3187	0.9675	0.7214	5538.2	0.9979	0.2786	6517.67
Cercopithecus_cephus	0.4012	0.5988	none	799999	799999	passed	0.7225	799999	passed	0.0768	0.9684	0.7105	5415.55	0.9978	0.2895	6817.21
Cercopithecus_diana	0.55487	0.44513	none	799999	799999	passed	0.4948	796973	passed	0.2129	0.9683	0.716	5427.75	0.9978	0.284	6687.48
Cercopithecus_erythrotis	0.43922	0.56078	none	799999	799999	passed	0.9704	799999	passed	0.8574	0.9683	0.7104	5317.16	0.9978	0.2896	6642
Cercopithecus_hamlyni	0.52168	0.47832	none	799999	799999	passed	0.3245	799999	passed	0.7088	0.9685	0.715	5547.99	0.9979	0.285	6264.3
Cercopithecus_lhoesti	0.50539	0.49461	none	799999	803865	passed	0.1328	799999	passed	0.1326	0.9687	0.7138	5361.49	0.9979	0.2862	6281.89
Cercopithecus_mitis	0.44937	0.55063	none	799999	799999	passed	0.487	799999	passed	0.1712	0.9683	0.716	5471.01	0.9979	0.284	6662.28
Cercopithecus_mona	0.44218	0.55782	none	799999	799999	passed	0.8676	799999	passed	0.9093	0.9689	0.7123	5085.5	0.9979	0.2877	5917.13
Cercopithecus_neglectus	0.46464	0.53536	none	799999	799999	passed	0.8938	799999	passed	0.9296	0.9683	0.7169	5187.89	0.9979	0.2831	6928.85
Cercopithecus_nictitans	0.44932	0.55068	none	799999	799999	passed	0.9694	799999	passed	0.7525	0.9679	0.714	5515.95	0.9978	0.286	6995.92
Cercopithecus_petaurista	0.75352	0.24648	none	639999	719999	passed	0.1281	719999	passed	0.5759	0.9691	0.7144	4918.28	0.9978	0.2856	5783.21
Cercopithecus_pogonias	0.56836	0.43164	none	799999	799999	passed	0.6785	799999	passed	0.2695	0.9677	0.7155	5470.93	0.9978	0.2845	6624.03
Cercopithecus_wolfi	0.46603	0.53397	none	639999	719999	passed	0.1194	719999	passed	0.6487	0.9681	0.7181	4858.89	0.9979	0.2819	6062.38
Cheirogaleus_major	0.19041	0.80959	none	799999	811644	passed	0.8058	799999	passed	0.77	0.9711	0.6706	5502.28	0.9979	0.3294	6523.75
Cheirogaleus_medius	0.96611	0.033893	none	799999	790454	passed	0.8255	808465	passed	0.5484	0.9653	0.7551	5439.76	0.9978	0.2449	6486.79
Chiropotes_satanas	0.91923	0.080773	none	799999	792592	passed	0.2365	799999	passed	0.9252	0.9744	0.6119	5303.4	0.9982	0.3881	6698.6
Chlorocebus_aethiops	0.48468	0.51532	none	799999	799999	passed	0.4997	796374	passed	0.9943	0.9683	0.7188	5605.35	0.9978	0.2812	6739.25
Chlorocebus_pygerythrus	0.60663	0.39337	none	799999	795869	passed	0.7209	803970	passed	0.517	0.9677	0.7265	5664.95	0.9978	0.2735	6863.2
Chlorocebus_sabaeus	0.54816	0.45184	none	799999	804870	passed	0.6052	799999	passed	0.3327	0.9689	0.7175	5584.09	0.9979	0.2825	6873.37
Colobus_angolensis	0.41847	0.58153	none	799999	799999	passed	0.8935	803487	passed	0.4924	0.968	0.7217	5619.08	0.9979	0.2783	6609.48
Colobus_guereza	0.4973	0.5027	none	799999	799999	passed	0.3849	799999	passed	0.1162	0.9688	0.7157	5116.93	0.9978	0.2843	6454.26
Colobus_polykomos	0.46934	0.53066	none	799999	799999	passed	0.5011	799999	passed	0.0612	0.9665	0.7278	5278.61	0.9976	0.2722	7463.74
Colobus_satanas	0.48148	0.51852	none	799999	799999	passed	0.1455	799999	passed	0.8296	0.9684	0.7209	5280.89	0.9979	0.2791	6698.86
Colobus_vellerosus	0.54883	0.45117	none	799999	799999	passed	0.7252	799999	passed	0.6577	0.9663	0.7276	5724.93	0.9977	0.2724	6991.92
Daubentonia_madagascariensis	0.065048	0.93495	none	799999	799999	passed	0.4059	799999	passed	0.2084	0.9665	0.7282	5453.61	0.9978	0.2718	6708.23
Erythrocebus_patas	0.17334	0.82666	none	799999	799999	passed	0.8704	799999	passed	0.1684	0.9689	0.7197	5357.5	0.9978	0.2803	6747.83
Eulemur_coronatus	0.53796	0.46204	none	799999	799999	passed	0.613	799999	passed	0.9799	0.9682	0.7189	5556.92	0.9979	0.2811	6596.58
Eulemur_mongoz	0.66901	0.33099	none	799999	796669	passed	0.6404	799999	passed	0.2642	0.9687	0.7162	5431.19	0.9979	0.2838	6598.88
Eulemur_rubriventer	0.16539	0.83461	none	799999	799999	passed	0.0967	799999	passed	0.5329	0.9685	0.7184	5531.91	0.9979	0.2816	6825.13
Euoticus_elegantulus	0.34115	0.65885	none	799999	799999	passed	0.9819	793697	passed	0.635	0.9712	0.6629	5493.55	0.9979	0.3371	7006.16
Galago_moholi	0.78661	0.21339	none	799999	799999	passed	0.2649	799999	passed	0.1142	0.9691	0.7039	5309.14	0.9978	0.2961	6924.26
Galago_senegalensis	0.55556	0.44444	none	799999	798362	passed	0.8909	804352	passed	0.3348	0.9682	0.7114	5501.17	0.9978	0.2886	6528.66
Gorilla_beringei	0.4206	0.5794	none	799999	804769	passed	0.9097	799999	passed	0.3799	0.9716	0.6639	5250.48	0.9979	0.3361	6696.9
Hapalemur_griseus	0.80692	0.19308	none	799999	799999	passed	0.0638	799999	passed	0.6524	0.9682	0.7191	5500.03	0.9979	0.2809	6260.17
Hylobates_agilis	0.51578	0.48422	none	799999	803337	passed	0.6427	799999	passed	0.4903	0.9686	0.7132	5203.23	0.9978	0.2868	6291.84
Hylobates_klossii	0.60991	0.39009	none	799999	799999	passed	0.8236	799999	passed	0.3319	0.9685	0.717	5214.79	0.9978	0.283	6634.02
Hylobates_lar	0.34531	0.65469	none	799999	799999	passed	0.3324	799999	passed	0.1105	0.9688	0.7114	5218.94	0.9978	0.2886	6483.45
Hylobates_muelleri	0.69273	0.30727	none	799999	799999	passed	0.8085	799999	passed	0.8804	0.968	0.7135	5352.29	0.9978	0.2865	6297.62
Hylobates_pileatus	0.72906	0.27094	none	799999	799999	passed	0.9078	799999	passed	0.6294	0.9688	0.7136	5312.8	0.9978	0.2864	6816.32
Indri_indri	0.057339	0.94266	none	799999	795811	passed	0.7861	799999	passed	0.7233	0.9673	0.7195	5365.19	0.9978	0.2805	6618.13
Lagothrix_lagotricha	0.20893	0.79107	none	799999	799999	passed	0.0589	798333	passed	0.8229	0.9712	0.6624	4989.06	0.9979	0.3376	6677.87
Lemur_catta	0.17811	0.82189	none	799999	804718	passed	0.0991	799999	passed	0.6646	0.9686	0.7147	5294.71	0.9978	0.2853	6564.29
Leontopithecus_rosalia	0.56941	0.43059	none	479999	639999	passed	0.8926	639999	passed	0.0535	0.9715	0.6633	4373.89	0.9979	0.3367	5458.57
Lepilemur_leucopus	0.73321	0.26679	none	799999	799999	passed	0.7131	799999	passed	0.4527	0.969	0.7158	5395.72	0.9979	0.2842	6593.37
Lepilemur_mustelinus	0.34247	0.65753	none	479999	639999	passed	0.1479	637200	passed	0.2305	0.9693	0.7111	4234.8	0.9979	0.2889	5035.38
Lophocebus_albigena	0.78837	0.21163	none	799999	799999	passed	0.5465	797375	passed	0.3772	0.9689	0.6965	5233.04	0.9978	0.3035	6827.42
Lophocebus_aterrimus	0.40333	0.59667	none	799999	799999	passed	0.1553	799999	passed	0.7453	0.9689	0.7023	5149.39	0.9978	0.2977	6994.61
Loris_lydekkerianus	0.31208	0.68792	none	799999	799999	passed	0.5243	799999	passed	0.7506	0.9691	0.7134	5457.97	0.9978	0.2866	6544.83
Loris_tardigradus	0.74542	0.25458	none	799999	799999	passed	0.3632	799999	passed	0.6867	0.9685	0.7161	5221.1	0.9978	0.2839	6487.9
Macaca_arctoides	0.27167	0.72833	none	799999	799999	passed	0.2674	804205	passed	0.7751	0.9691	0.7121	5573.01	0.9978	0.2879	6608.97
Macaca_assamensis	0.31631	0.68369	none	799999	799999	passed	0.5533	799999	passed	0.6085	0.9682	0.7152	5257.93	0.9978	0.2848	6773.6
Macaca_fascicularis	0.8805	0.1195	none	799999	795700	passed	0.4261	796746	passed	0.9937	0.9684	0.7099	5279.47	0.9978	0.2901	6805.43
Macaca_fuscata	0.29566	0.70434	none	799999	804917	passed	0.544	802843	passed	0.2285	0.9682	0.7183	5666	0.9978	0.2817	6476.56
Macaca_leonina	0.61369	0.38631	none	799999	799999	passed	0.3809	799999	passed	0.4357	0.9685	0.7167	5318.55	0.9978	0.2833	6075.78
Macaca_mulatta	0.36133	0.63867	none	799999	796109	passed	0.2025	799999	passed	0.4813	0.9679	0.7161	5579.88	0.9979	0.2839	6733.03
Macaca_nemestrina	0.23127	0.76873	none	799999	799999	passed	0.5948	797451	passed	0.3884	0.9688	0.709	5206.38	0.9979	0.291	6884.8
Macaca_nigra	0.43284	0.56716	none	799999	799999	passed	0.2595	799999	passed	0.5606	0.9686	0.7151	5458.85	0.9978	0.2849	6407.62
Macaca_radiata	0.62913	0.37087	none	799999	799999	passed	0.2349	799999	passed	0.1418	0.9688	0.7097	5400.24	0.9978	0.2903	6451.91
Macaca_sinica	0.79216	0.20784	none	799999	799999	passed	0.7154	805358	passed	0.5956	0.9694	0.7062	5150.88	0.9978	0.2938	6771.05
Macaca_sylvanus	0.46343	0.53657	none	799999	799999	passed	0.1386	796641	passed	0.6152	0.9685	0.7182	5317.52	0.9979	0.2818	5854.48
Mandrillus_leucophaeus	0.32336	0.67664	none	799999	799999	passed	0.5739	799999	passed	0.5961	0.9691	0.7163	5485.63	0.9978	0.2837	6622.17
Mandrillus_sphinx	0.24525	0.75475	none	799999	799999	passed	0.5224	799999	passed	0.3505	0.9697	0.7038	5261.24	0.9978	0.2962	6730.74
Microcebus_murinus	0.89239	0.10761	none	799999	799999	passed	0.5121	799999	passed	0.1444	0.9716	0.6484	5350.55	0.9978	0.3516	6988.93
Microcebus_rufus	0.8412	0.1588	none	799999	799999	passed	0.1688	792040	passed	0.3745	0.9717	0.653	5164.82	0.9978	0.347	6546.08
Mirza_coquereli	0.13412	0.86588	none	799999	799999	passed	0.2093	799999	passed	0.4049	0.9719	0.6597	5295.74	0.9978	0.3403	6873.14
Nasalis_larvatus	0.41288	0.58712	none	799999	799999	passed	0.4104	799999	passed	0.9515	0.9709	0.6738	5474.89	0.9979	0.3262	6590.91
Nomascus_gabriellae	0.44849	0.55151	none	799999	799999	passed	0.5115	799999	passed	0.696	0.9693	0.7126	5251.99	0.9978	0.2874	6517.33
Nycticebus_bengalensis	0.0078963	0.9921	positive	799999	799999	passed	0.8866	797304	passed	0.8066	NaN	0	NA	0.9988	1	5397.28
Nycticebus_coucang	0.985	0.015004	negative	799999	799999	passed	0.6213	799999	passed	0.7678	NaN	0	NA	0.9987	1	5082.03
Nycticebus_pygmaeus	0.81025	0.18975	none	799999	799999	passed	0.9885	799999	passed	0.2238	0.968	0.7159	5310.01	0.9978	0.2841	6704.24
Otolemur_crassicaudatus	0.35592	0.64408	none	639999	719999	passed	0.0611	715930	passed	0.7558	0.9687	0.7069	4889.99	0.9977	0.2931	5841.58
Otolemur_garnettii	0.47711	0.52289	none	799999	799999	passed	0.2075	799999	passed	0.3613	0.9682	0.7008	5290.89	0.9978	0.2992	6576.66
Pan_paniscus	0.85641	0.14359	none	799999	799999	passed	0.85	798788	passed	0.8942	0.969	0.7064	5479	0.9978	0.2936	6412.61
Pan_troglodytes_schweinfurthii	0.26735	0.73265	none	799999	799999	passed	0.2753	799999	passed	0.4415	0.97	0.6489	5469.3	0.9978	0.3511	6908.19
Pan_troglodytes_troglodytes	0.76021	0.23979	none	799999	800656	passed	0.5065	801204	passed	0.639	0.9706	0.643	5227.67	0.9978	0.357	7086.89
Pan_troglodytes_verus	0.59669	0.40331	none	799999	802615	passed	0.9681	799999	passed	0.9286	0.9679	0.7142	5528.97	0.9978	0.2858	6460.35
Papio_anubis	0.22532	0.77468	none	799999	799999	passed	0.4392	799999	passed	0.5261	0.9687	0.7125	5548.35	0.9978	0.2875	6852.31
Papio_cynocephalus	0.34158	0.65842	none	799999	795868	passed	0.3696	799999	passed	0.6531	0.9677	0.7116	5134.94	0.9978	0.2884	6331.29
Papio_hamadryas	0.68436	0.31564	none	799999	799999	passed	0.5966	799999	passed	0.5232	0.9682	0.7099	5196.44	0.9978	0.2901	6229.45
Papio_papio	0.71121	0.28879	none	799999	797422	passed	0.5457	801730	passed	0.2693	0.9684	0.7153	5471.02	0.9978	0.2847	6215.01
Papio_ursinus	0.16978	0.83022	none	799999	799999	passed	0.4333	799999	passed	0.3714	0.9686	0.7128	5201.42	0.9978	0.2872	6420.37
Perodicticus_potto	0.19358	0.80642	none	799999	804808	passed	0.6383	795866	passed	0.9049	0.9689	0.713	5055.22	0.9978	0.287	6188.56
Piliocolobus_badius	0.53457	0.46543	none	799999	799999	passed	0.9055	799999	passed	0.0803	0.9682	0.7192	5163.11	0.9979	0.2808	6591.27
Piliocolobus_kirkii	0.78301	0.21699	none	799999	805132	passed	0.4382	802857	passed	0.4747	0.9689	0.7157	5406.96	0.9978	0.2843	6313.29
Piliocolobus_tephrosceles	0.23982	0.76018	none	799999	799999	passed	0.1507	799999	passed	0.5339	0.9683	0.7157	5456.89	0.9978	0.2843	6461.9
Pithecia_pithecia	0.874	0.126	none	799999	810010	passed	0.158	799069	passed	0.9757	0.969	0.7359	5162	0.998	0.2641	6649.21
Pongo_abelii	0.35435	0.64565	none	799999	799999	passed	0.7751	799999	passed	0.4396	0.9686	0.7102	5286.37	0.9978	0.2898	6654.75
Pongo_pygmaeus	0.42832	0.57168	none	799999	799999	passed	0.6284	818991	passed	0.4143	0.9684	0.7125	5100.46	0.9978	0.2875	6334.42
Presbytis_comata	0.34252	0.65748	none	799999	801951	passed	0.1137	793376	passed	0.2686	0.9682	0.7207	5281.79	0.9978	0.2793	6258.28
Presbytis_melalophos	0.73219	0.26781	none	479999	639999	passed	0.1451	639999	passed	0.9039	0.9684	0.7174	4461.51	0.9978	0.2826	5256.95
Procolobus_verus	0.78014	0.21986	none	799999	799999	passed	0.1319	799999	passed	0.6819	0.9681	0.7185	5361.15	0.9979	0.2815	6165.58
Propithecus_deckenii	0.15244	0.84756	none	799999	799999	passed	0.8677	799999	passed	0.9142	0.9706	0.6599	5437.62	0.9979	0.3401	7091.61
Propithecus_diadema	0.34564	0.65436	none	799999	800255	passed	0.8025	799999	passed	0.5388	0.9686	0.7063	5635.68	0.9978	0.2937	7219.58
Propithecus_edwardsi	0.38013	0.61987	none	799999	799999	passed	0.3507	799945	passed	0.4103	0.9686	0.7108	5534.98	0.9978	0.2892	6638.37
Propithecus_verreauxi	0.85879	0.14121	none	799999	800701	passed	0.5291	799999	passed	0.6849	0.9707	0.6581	5183.18	0.9979	0.3419	6478.26
Rhinopithecus_roxellana	0.1585	0.8415	none	799999	799999	passed	0.503	799999	passed	0.1508	0.9684	0.715	5781.3	0.9978	0.285	6712.95
Saguinus_fuscicollis	0.85831	0.14169	none	799999	791554	passed	0.9158	799999	passed	0.6004	0.9695	0.7115	5100.53	0.9979	0.2885	6072.88
Saguinus_geoffroyi	0.43311	0.56689	none	799999	799999	passed	0.8943	799999	passed	0.9137	0.9682	0.7094	5367.4	0.9978	0.2906	6312.27
Saguinus_leucopus	0.59783	0.40217	none	799999	799999	passed	0.6061	799999	passed	0.7354	0.9688	0.7109	5556.59	0.9979	0.2891	6531.91
Saguinus_midas	0.48803	0.51197	none	799999	799999	passed	0.8783	799999	passed	0.2069	0.9681	0.7162	5437.02	0.9978	0.2838	6147.38
Saguinus_mystax	0.4702	0.5298	none	799999	799999	passed	0.8897	799999	passed	0.6346	0.9705	0.6798	5420.81	0.9979	0.3202	6076.48
Saguinus_niger	0.59206	0.40794	none	799999	799770	passed	0.5609	799999	passed	0.5995	0.9682	0.7086	5288.99	0.9978	0.2914	6888.86
Saguinus_oedipus	0.59635	0.40365	none	799999	799999	passed	0.6952	799999	passed	0.5646	0.969	0.7055	5204.81	0.9978	0.2945	6181.13
Saimiri_oerstedii	0.45938	0.54062	none	799999	799999	passed	0.5393	799999	passed	0.411	0.9684	0.715	5138.23	0.9978	0.285	6347.98
Saimiri_sciureus	0.60501	0.39499	none	799999	799999	passed	0.4191	799999	passed	0.8496	0.9675	0.717	5410.63	0.9978	0.283	6460.33
Symphalangus_syndactylus	0.33524	0.66476	none	799999	796968	passed	0.1355	796838	passed	0.3596	0.9694	0.7156	5449.64	0.9979	0.2844	6667.49
Tarsius_bancanus	0.78159	0.21841	none	799999	796518	passed	0.5683	799999	passed	0.211	0.969	0.7168	5400.55	0.9978	0.2832	6583.1
Tarsius_syrichta	0.72462	0.27538	none	799999	799999	passed	0.4017	799999	passed	0.0782	0.9707	0.6774	5510.91	0.9979	0.3226	6562.25
Theropithecus_gelada	0.33746	0.66254	none	799999	799999	passed	0.9218	799999	passed	0.6296	0.9688	0.7116	5247.42	0.9979	0.2884	6135.72
Trachypithecus_cristatus	0.71932	0.28068	none	799999	799999	passed	0.4064	799999	passed	0.6831	0.9689	0.7099	5269.73	0.9978	0.2901	6570.05
Trachypithecus_geei	0.3197	0.6803	none	479999	639999	passed	0.2858	639999	passed	0.1622	0.9688	0.7217	4513.82	0.9978	0.2783	5356.03
Trachypithecus_johnii	0.28616	0.71384	none	799999	795488	passed	0.3444	799999	passed	0.5063	0.9691	0.7065	5356.34	0.9978	0.2935	5995
Trachypithecus_obscurus	0.57652	0.42348	none	799999	799999	passed	0.3999	799999	passed	0.8812	0.9687	0.7093	5366.78	0.9979	0.2907	6734.25
Trachypithecus_phayrei	0.35517	0.64483	none	639999	713453	passed	0.4024	722912	passed	0.1281	0.9688	0.7118	4875.59	0.9978	0.2882	5888.66
Trachypithecus_vetulus	0.85191	0.14809	none	799999	799999	passed	0.0873	798037	passed	0.1329	0.969	0.7122	5411.63	0.9978	0.2878	6656.23
Homo_sapiens	0.14087	0.85913	none	799999	797420	passed	0.9301	799999	passed	0.3421	0.9708	0.6744	5418.25	0.9976	0.3256	6529.79
Homo_sapiens_neanderthalensis	0.28892	0.71108	none	799999	799999	passed	0.98	799999	passed	0.72	0.9702	0.6753	5191.69	0.9976	0.3247	6294.6

## Sheet: Neocortex~body mass
species	% preds higher than observed	% preds lower than observed	outlier status	run length	ess intercept	intercept stationarity test	p-value	ess coef predictor	coef predictor stationarity test	p-value	mean kappa	kappa freq	ess kappa	mean lambda	lambda freq	ess lambda
Alouatta_palliata	0.80097	0.19903	none	799999	443841	passed	0.3392	331753	passed	0.5623	0.185	0.7073	5496.03	0.7779	0.2927	9704.56
Alouatta_seniculus	0.70963	0.29037	none	799999	445347	passed	0.5744	337064	passed	0.4298	0.1919	0.7091	5533.44	0.7762	0.2909	9254.77
Aotus_trivirgatus	0.87831	0.12169	none	799999	585557	passed	0.6552	475124	passed	0.5222	0.2226	0.8003	5054.97	0.8241	0.1997	7316.17
Ateles_geoffroyi	0.22791	0.77209	none	799999	577023	passed	0.8055	504330	passed	0.6989	0.2186	0.785	5216.91	0.8165	0.215	8481.26
Avahi_laniger	0.86839	0.13161	none	799999	530241	passed	0.7929	417245	passed	0.2847	0.1951	0.8052	4738.33	0.8113	0.1948	8053.93
Callicebus_moloch	0.8952	0.1048	none	799999	538576	passed	0.1391	446763	passed	0.1002	0.1995	0.8173	4417.94	0.824	0.1827	6999.7
Callimico_goeldii	0.34177	0.65823	none	799999	565362	passed	0.4656	452169	passed	0.7118	0.1981	0.8062	4823.51	0.8181	0.1938	7643.8
Callithrix_jacchus	0.7475	0.2525	none	799999	655337	passed	0.5198	526074	passed	0.8287	0.2	0.7985	4866.31	0.8155	0.2015	7958.34
Callithrix_pygmaea	0.33325	0.66675	none	799999	572588	passed	0.1378	479797	passed	0.3632	0.1965	0.7967	4902.55	0.8091	0.2033	7407.04
Cebus_albifrons	0.045964	0.95404	none	639999	464690	passed	0.1138	373376	passed	0.1795	0.2022	0.6342	6054.9	0.764	0.3658	10355.6
Cebus_apella	0.39745	0.60255	none	799999	524275	passed	0.7516	413534	passed	0.5425	0.2032	0.6402	6385.48	0.7697	0.3598	9591.51
Cercocebus_torquatus	0.32459	0.67541	none	639999	517923	passed	0.0542	417376	passed	0.0556	0.187	0.7807	4468.64	0.798	0.2193	7771.33
Cercopithecus_ascanius	0.35999	0.64001	none	799999	589216	passed	0.4317	473501	passed	0.9054	0.191	0.7921	4857.29	0.8059	0.2079	8303.27
Cercopithecus_mitis	0.56302	0.43698	none	799999	547268	passed	0.3621	429666	passed	0.4002	0.1796	0.7824	4853.52	0.802	0.2176	8952.62
Cercopithecus_nictitans	0.60865	0.39135	none	799999	552636	passed	0.3498	439865	passed	0.3067	0.1784	0.7857	4794.92	0.8041	0.2143	7944.28
Cheirogaleus_major	0.37309	0.62691	none	799999	554358	passed	0.3206	449967	passed	0.1913	0.2066	0.8009	4609.92	0.8188	0.1991	7632.86
Cheirogaleus_medius	0.59819	0.40181	none	799999	542175	passed	0.1497	439112	passed	0.0738	0.2136	0.794	4813.58	0.8128	0.206	8358.82
Daubentonia_madagascariensis	0.10517	0.89483	none	799999	627888	passed	0.0924	405343	passed	0.1222	0.1786	0.8042	4794.09	0.8296	0.1958	7259.85
Erythrocebus_patas	0.50002	0.49998	none	639999	507384	passed	0.3044	408490	passed	0.0771	0.1855	0.7901	4232.48	0.8081	0.2099	7065.46
Eulemur_fulvus_fulvus	0.61026	0.38974	none	319999	364092	passed	0.0534	287592	passed	0.0526	0.2221	0.7624	3764.66	0.8057	0.2376	5790.67
Eulemur_mongoz	0.095283	0.90472	none	799999	592742	passed	0.46	486953	passed	0.1717	0.1959	0.7798	4875.91	0.8064	0.2202	8467.29
Galago_senegalensis	0.34899	0.65101	none	799999	575221	passed	0.7708	447932	passed	0.7517	0.3228	0.7497	8228.53	0.8199	0.2503	8972.85
Galagoides_demidoff	0.066876	0.93312	none	799999	598469	passed	0.5533	519597	passed	0.2551	0.2274	0.7906	5637.44	0.8224	0.2094	6903.59
Gorilla_gorilla_gorilla	0.98633	0.013666	negative	799999	737501	passed	0.3952	618184	passed	0.1567	0.2701	0.8679	4587.44	0.8803	0.1321	5332.88
Homo_sapiens	1.25e-06	1	positive	799999	772089	passed	0.5809	781799	passed	0.1897	0.7334	0.8469	4605.81	0.965	0.1531	3711.58
Hylobates_lar	0.41051	0.58949	none	799999	546167	passed	0.2023	454800	passed	0.3944	0.2229	0.772	5110.17	0.8203	0.228	7023.15
Indri_indri	0.58461	0.41539	none	799999	529244	passed	0.3638	414701	passed	0.5989	0.208	0.7804	4805.33	0.8122	0.2196	8183.54
Lagothrix_lagotricha	0.36435	0.63565	none	799999	574017	passed	0.9126	490179	passed	0.5777	0.2172	0.7657	5165.47	0.81	0.2343	7902.78
Lemur_catta	0.72641	0.27359	none	799999	561770	passed	0.3365	457519	passed	0.3854	0.2034	0.7857	4816.88	0.8188	0.2143	8585.81
Lepilemur_mustelinus	0.90386	0.096145	none	639999	520069	passed	0.1279	427388	passed	0.0531	0.1923	0.7833	4522.03	0.8071	0.2167	6588.28
Lophocebus_albigena	0.49114	0.50886	none	799999	549261	passed	0.6964	438860	passed	0.2316	0.1908	0.791	4743.86	0.8029	0.209	8077.45
Loris_tardigradus	0.12967	0.87033	none	799999	549570	passed	0.0723	469628	passed	0.1675	0.1875	0.785	4772.6	0.8118	0.215	6975.38
Macaca_mulatta	0.70656	0.29344	none	799999	562850	passed	0.5898	460169	passed	0.6576	0.2014	0.8001	5045.83	0.8176	0.1999	7550.16
Mandrillus_sphinx	0.47834	0.52166	none	799999	550308	passed	0.3321	457733	passed	0.3604	0.1908	0.7836	4648.32	0.8038	0.2164	9020.83
Microcebus_murinus	0.4506	0.5494	none	799999	577919	passed	0.2324	483679	passed	0.1107	0.2137	0.794	5082.32	0.8226	0.206	8225.96
Miopithecus_talapoin	0.13786	0.86214	none	799999	501857	passed	0.4988	402100	passed	0.411	0.1864	0.7713	4622.11	0.8001	0.2287	8067.44
Nasalis_larvatus	0.65376	0.34624	none	799999	481621	passed	0.7141	361348	passed	0.4998	0.2095	0.73	5317.35	0.7899	0.27	7691.34
Nycticebus_coucang	0.66537	0.33463	none	799999	536349	passed	0.1158	442528	passed	0.0604	0.2367	0.784	5103.43	0.8249	0.216	8244.59
Otolemur_crassicaudatus	0.98769	0.012305	negative	799999	740421	passed	0.7761	611121	passed	0.6859	0.1902	0.7942	4534.16	0.8085	0.2058	8198.55
Pan_paniscus	0.8185	0.1815	none	799999	534474	passed	0.2512	420403	passed	0.2104	0.202	0.7718	5082.45	0.8217	0.2282	7303.86
Pan_troglodytes_troglodytes	0.65857	0.34143	none	799999	548529	passed	0.3083	430834	passed	0.4727	0.1839	0.7195	5482.66	0.8026	0.2805	9413.98
Papio_anubis	0.42142	0.57858	none	799999	560934	passed	0.3367	437330	passed	0.1582	0.1905	0.7921	4831.27	0.8035	0.2079	8191.61
Perodicticus_potto	0.68534	0.31466	none	799999	552259	passed	0.8624	467063	passed	0.4807	0.1995	0.7757	4791.6	0.8292	0.2243	6981.01
Piliocolobus_badius	0.62558	0.37442	none	799999	570892	passed	0.4476	451673	passed	0.2974	0.2032	0.7774	5058.48	0.813	0.2226	8894.22
Pithecia_pithecia	0.16587	0.83413	none	799999	653870	passed	0.3105	476681	passed	0.1394	0.1746	0.8138	4509.6	0.8242	0.1862	7544.01
Pongo_pygmaeus	0.24165	0.75835	none	799999	592121	passed	0.8398	464892	passed	0.8524	0.1932	0.7982	4632.59	0.8172	0.2018	7779.46
Propithecus_verreauxi	0.19299	0.80701	none	639999	535034	passed	0.1589	438743	passed	0.4853	0.1977	0.8139	3996.34	0.8301	0.1861	6408.08
Pygathrix_nemaeus	0.80489	0.19511	none	799999	481418	passed	0.3419	358456	passed	0.3041	0.2062	0.7261	5711.99	0.7893	0.2739	8968.16
Saguinus_midas	0.76517	0.23483	none	799999	595504	passed	0.427	486253	passed	0.3468	0.2043	0.789	5079.12	0.8093	0.211	7623.53
Saguinus_oedipus	0.43255	0.56745	none	639999	534823	passed	0.1598	448491	passed	0.0535	0.1961	0.7891	4566.61	0.8097	0.2109	7505.98
Saimiri_sciureus	0.29979	0.70021	none	639999	494496	passed	0.2896	410811	passed	0.3193	0.2962	0.7023	7021.3	0.8099	0.2977	7844.24
Semnopithecus_entellus	0.33512	0.66488	none	799999	551352	passed	0.4349	437334	passed	0.2462	0.1985	0.7932	4722.2	0.8176	0.2068	8001.49
Tarsius_syrichta	0.88053	0.11947	none	639999	248919	passed	0.0614	284303	passed	0.1377	0.17	0.8089	3762.62	0.8355	0.1911	6418.07
Varecia_variegata_variegata	0.67921	0.32079	none	799999	587415	passed	0.7264	481595	passed	0.8363	0.1986	0.7882	4988.05	0.8183	0.2118	8477.78

## Sheet: Cerebellum~body mass
species	% preds higher than observed	% preds lower than observed	outlier status	run length	ess intercept	intercept stationarity test	p-value	ess coef predictor	coef predictor stationarity test	p-value	mean kappa	kappa freq	ess kappa	mean lambda	lambda freq	ess lambda
Alouatta_palliata	0.93144	0.068563	none	799999	238389	passed	0.7664	187521	passed	0.9087	0.4953	0.3957	13958.6	0.6153	0.6043	6553.74
Alouatta_seniculus	0.68532	0.31468	none	799999	238680	passed	0.0794	187130	passed	0.0975	0.5112	0.3927	14552.9	0.6105	0.6073	6678.4
Aotus_trivirgatus	0.91646	0.083539	none	799999	433502	passed	0.5681	352464	passed	0.966	0.4814	0.5545	15078.7	0.7335	0.4455	8580.44
Ateles_geoffroyi	0.42992	0.57008	none	799999	368248	passed	0.0545	295440	passed	0.0591	0.5111	0.4826	14831.1	0.7063	0.5174	8211.84
Avahi_laniger	0.83474	0.16526	none	799999	388957	passed	0.2813	309210	passed	0.0646	0.4693	0.5445	13838	0.7096	0.4555	8175.67
Callicebus_moloch	0.9645	0.035504	none	799999	438579	passed	0.1299	361372	passed	0.1009	0.3996	0.6004	12925.9	0.7387	0.3996	9426.92
Callimico_goeldii	0.24707	0.75293	none	799999	411684	passed	0.1508	331609	passed	0.1703	0.4546	0.5559	15407.8	0.7147	0.4441	8424.45
Callithrix_jacchus	0.80956	0.19044	none	799999	471760	passed	0.4777	382856	passed	0.4008	0.4673	0.549	14677.5	0.7238	0.451	8804.66
Callithrix_pygmaea	0.29921	0.70079	none	799999	414537	passed	0.714	338085	passed	0.7749	0.4692	0.5296	14543.3	0.7009	0.4704	8216.53
Cebus_albifrons	0.018116	0.98188	positive	799999	231061	passed	0.8374	180464	passed	0.8939	0.5256	0.353	15397.7	0.6392	0.647	6946.22
Cebus_apella	0.38024	0.61976	none	799999	270760	passed	0.741	208078	passed	0.5849	0.5518	0.3918	13085.7	0.6249	0.6082	6383.72
Cercocebus_torquatus	0.37312	0.62688	none	799999	416314	passed	0.6341	330146	passed	0.2891	0.467	0.5255	15195.4	0.7024	0.4745	8326.66
Cercopithecus_ascanius	0.2217	0.7783	none	799999	411068	passed	0.8998	330495	passed	0.9801	0.467	0.5416	14080.8	0.7109	0.4584	7708.51
Cercopithecus_mitis	0.35766	0.64234	none	799999	371350	passed	0.3516	291397	passed	0.2036	0.4803	0.5024	14542.4	0.691	0.4976	7875.59
Cercopithecus_nictitans	0.92719	0.072811	none	799999	451396	passed	0.3346	358954	passed	0.2377	0.5117	0.5687	13945.4	0.7479	0.4313	8264.25
Cheirogaleus_major	0.41689	0.58311	none	799999	377535	passed	0.6166	310337	passed	0.7007	0.4835	0.5352	14549.7	0.7131	0.4648	8803.96
Cheirogaleus_medius	0.45321	0.54679	none	799999	389968	passed	0.2599	314111	passed	0.3228	0.4829	0.529	14292	0.7069	0.471	8351.84
Daubentonia_madagascariensis	0.053769	0.94623	none	799999	440390	passed	0.8447	311970	passed	0.8957	0.3464	0.5968	12141	0.7166	0.4032	9269.03
Erythrocebus_patas	0.69124	0.30876	none	799999	444525	passed	0.6326	354603	passed	0.5592	0.4555	0.5416	15008.5	0.7017	0.4584	8203.93
Eulemur_fulvus_fulvus	0.2753	0.7247	none	479999	294672	passed	0.2063	230914	passed	0.0671	0.4527	0.4993	12246.9	0.6952	0.5007	6708
Eulemur_mongoz	0.42054	0.57946	none	799999	378549	passed	0.3447	304827	passed	0.2255	0.4668	0.4862	14900	0.6838	0.5138	8196.59
Galago_senegalensis	0.2422	0.7578	none	799999	387582	passed	0.8463	305272	passed	0.7237	0.5371	0.5058	14834.7	0.7194	0.4942	8126.11
Galagoides_demidoff	0.092241	0.90776	none	799999	412494	passed	0.3665	345710	passed	0.6656	0.468	0.5049	14751.8	0.6956	0.4951	8085.79
Gorilla_gorilla_gorilla	0.88951	0.11049	none	799999	525659	passed	0.5132	437608	passed	0.7377	0.4955	0.6038	14358.9	0.7671	0.3962	9173.95
Homo_sapiens	0.00025625	0.99974	positive	799999	416600	passed	0.2249	312027	passed	0.2483	0.7872	0.6482	6818.33	0.9018	0.3518	5392.26
Hylobates_lar	0.25471	0.74529	none	799999	351709	passed	0.2047	284407	passed	0.2806	0.51	0.4883	13443.3	0.6802	0.5117	7329.72
Indri_indri	0.69461	0.30539	none	799999	371454	passed	0.925	298310	passed	0.8706	0.4822	0.5141	15419.7	0.6839	0.4859	7651.44
Lagothrix_lagotricha	0.13192	0.86808	none	799999	403764	passed	0.4877	330885	passed	0.4522	0.4952	0.5226	15288.5	0.738	0.4774	8575.47
Lemur_catta	0.77824	0.22176	none	799999	420735	passed	0.197	335337	passed	0.1602	0.469	0.5428	14782.4	0.7146	0.4572	7887.29
Lepilemur_mustelinus	0.77794	0.22206	none	799999	390173	passed	0.9402	314891	passed	0.8952	0.485	0.5284	14167.2	0.7149	0.4716	8063.15
Lophocebus_albigena	0.1645	0.8355	none	799999	415039	passed	0.8857	337700	passed	0.83	0.4697	0.5214	15959.8	0.7133	0.4786	8660.96
Loris_tardigradus	0.24385	0.75615	none	799999	407525	passed	0.859	335864	passed	0.8087	0.482	0.5319	14958.5	0.716	0.4681	8377.8
Macaca_mulatta	0.69026	0.30974	none	799999	425879	passed	0.9871	341369	passed	0.9808	0.4691	0.5417	14394.9	0.7106	0.4583	8527.17
Mandrillus_sphinx	0.82853	0.17147	none	799999	427663	passed	0.1988	335077	passed	0.1988	0.4668	0.5374	14053.2	0.7074	0.4626	8273.35
Microcebus_murinus	0.53042	0.46958	none	799999	399319	passed	0.2878	332056	passed	0.3841	0.4971	0.5427	14841.4	0.7247	0.4573	8491.77
Miopithecus_talapoin	0.10672	0.89328	none	799999	444504	passed	0.6382	362981	passed	0.5755	0.4677	0.5117	15505.9	0.7091	0.4883	8387.74
Nasalis_larvatus	0.50648	0.49352	none	799999	372698	passed	0.0959	293862	passed	0.1024	0.4816	0.5093	14555	0.6855	0.4907	7830.49
Nycticebus_coucang	0.71124	0.28876	none	799999	420088	passed	0.3623	340816	passed	0.2475	0.4845	0.546	15170.1	0.7303	0.454	8546.73
Otolemur_crassicaudatus	0.97792	0.022076	negative	799999	569275	passed	0.9511	485709	passed	0.6776	0.4007	0.5498	13210.2	0.7357	0.4502	8977.51
Pan_paniscus	0.41037	0.58963	none	799999	313799	passed	0.8384	244208	passed	0.8795	0.4675	0.439	14839.2	0.6634	0.561	7054.86
Pan_troglodytes_troglodytes	0.86153	0.13847	none	799999	438489	passed	0.3692	353699	passed	0.6702	0.5083	0.5828	14285.6	0.7597	0.4172	8055.36
Papio_anubis	0.55578	0.44422	none	799999	412561	passed	0.6152	330036	passed	0.5878	0.4679	0.5108	15377.5	0.6933	0.4892	8363.01
Perodicticus_potto	0.55759	0.44241	none	799999	404502	passed	0.4061	326550	passed	0.3004	0.51	0.5328	14552.2	0.7394	0.4672	8863.37
Piliocolobus_badius	0.5451	0.4549	none	799999	400057	passed	0.2155	314663	passed	0.0641	0.4837	0.5263	14750.7	0.7099	0.4737	8180.5
Pithecia_pithecia	0.1369	0.8631	none	799999	438337	passed	0.6775	356844	passed	0.6917	0.3878	0.5925	12857.2	0.7402	0.4075	8161.63
Pongo_pygmaeus	0.26703	0.73297	none	799999	405929	passed	0.7881	325110	passed	0.3986	0.4818	0.5171	14885.7	0.6973	0.4829	8030.03
Propithecus_verreauxi	0.21029	0.78971	none	799999	448388	passed	0.5367	357868	passed	0.1331	0.4682	0.5821	14750.3	0.7436	0.4179	8514.74
Pygathrix_nemaeus	0.87678	0.12322	none	799999	345003	passed	0.4343	268100	passed	0.2832	0.4811	0.4872	14016.6	0.6708	0.5128	7359.66
Saguinus_midas	0.74558	0.25442	none	799999	415789	passed	0.5777	328692	passed	0.4881	0.4803	0.5048	14826.2	0.7033	0.4952	8383.67
Saguinus_oedipus	0.58072	0.41928	none	799999	399961	passed	0.1482	316915	passed	0.0842	0.4704	0.5086	14623.1	0.6991	0.4914	8439.19
Saimiri_sciureus	0.19219	0.80781	none	799999	314659	passed	0.8519	240147	passed	0.8643	0.5946	0.4253	12988.6	0.6929	0.5747	7457.44
Semnopithecus_entellus	0.50172	0.49828	none	799999	377121	passed	0.7882	292724	passed	0.7432	0.4829	0.526	14649.2	0.6995	0.474	7121.89
Tarsius_syrichta	0.92278	0.077224	none	799999	303526	passed	0.2725	286331	passed	0.4075	0.32	0.6113	10387.4	0.7406	0.3887	8682.72
Varecia_variegata_variegata	0.5626	0.4374	none	799999	404912	passed	0.241	322246	passed	0.3083	0.4943	0.5391	14465.1	0.7185	0.4609	8196.77

## Sheet: Medulla~body mass
species	% preds higher than observed	% preds lower than observed	outlier status	run length	ess intercept	intercept stationarity test	p-value	ess coef predictor	coef predictor stationarity test	p-value	mean kappa	kappa freq	ess kappa	mean lambda	lambda freq	ess lambda
Alouatta_seniculus	0.93619	0.063805	none	799999	210023	passed	0.0746	240568	passed	0.0596	0.1843	0.2098	6604.89	0.5512	0.7902	6233.86
Aotus_trivirgatus	0.41861	0.58139	none	799999	171673	passed	0.79	178291	passed	0.8844	0.1579	0.1825	5163.01	0.5413	0.8175	5826.86
Ateles_geoffroyi	0.9407	0.059299	none	799999	285490	passed	0.4601	310580	passed	0.3358	0.3785	0.2884	12155.9	0.5534	0.7116	6721.47
Avahi_laniger	0.85259	0.14741	none	799999	160171	passed	0.4281	158046	passed	0.7279	0.1669	0.2034	5530.63	0.5176	0.7966	5905.86
Callicebus_moloch	0.21534	0.78466	none	799999	190061	passed	0.473	187136	passed	0.3056	0.1566	0.1871	5396.24	0.5362	0.8129	5913.28
Callimico_goeldii	0.54725	0.45275	none	799999	189444	passed	0.4825	194246	passed	0.5023	0.175	0.1907	6184.32	0.5362	0.8093	5813.09
Callithrix_jacchus	0.659	0.341	none	799999	198754	passed	0.3974	200344	passed	0.4932	0.1742	0.1656	5552.61	0.535	0.8344	6180.45
Callithrix_pygmaea	0.8372	0.1628	none	799999	182866	passed	0.8167	181948	passed	0.5363	0.1852	0.1761	6432.26	0.5587	0.8239	6286.42
Cebus_albifrons	0.1009	0.8991	none	799999	162277	passed	0.0845	154887	passed	0.0737	0.3795	0.1976	5747.96	0.5426	0.8024	6244.52
Cercopithecus_ascanius	0.32744	0.67256	none	799999	171340	passed	0.0604	185657	passed	0.3227	0.1554	0.1788	4718.65	0.5284	0.8212	5927.51
Cercopithecus_mitis	0.7354	0.2646	none	799999	200843	passed	0.8211	224196	passed	0.8828	0.1574	0.2178	4811.38	0.5546	0.7822	6199.2
Cheirogaleus_major	0.32813	0.67187	none	639999	169908	passed	0.2807	181091	passed	0.265	0.158	0.2261	5259.11	0.548	0.7739	5361.79
Cheirogaleus_medius	0.67742	0.32258	none	799999	227554	passed	0.2099	234559	passed	0.2741	0.2599	0.234	8390.83	0.5323	0.766	6349.9
Daubentonia_madagascariensis	0.059383	0.94062	none	799999	230050	passed	0.3037	202253	passed	0.4729	0.2086	0.2	6503.06	0.5412	0.8	6893.33
Erythrocebus_patas	0.33732	0.66268	none	799999	156658	passed	0.5757	168938	passed	0.4122	0.1475	0.1762	4397.9	0.532	0.8238	5905.71
Eulemur_fulvus_fulvus	0.086394	0.91361	none	799999	270769	passed	0.3581	252900	passed	0.2151	0.4881	0.2314	12664	0.5696	0.7686	6921.65
Galago_senegalensis	0.40178	0.59822	none	799999	193462	passed	0.4423	201959	passed	0.3508	0.1974	0.2039	6747.91	0.5385	0.7961	6358.89
Galagoides_demidoff	0.27491	0.72509	none	799999	211198	passed	0.5813	224325	passed	0.3546	0.2089	0.2045	7080.55	0.5379	0.7955	6292.98
Homo_sapiens	0.016705	0.9833	positive	479999	251375	passed	0.176	273588	passed	0.2408	0.7887	0.4308	4744.34	0.6888	0.5692	4635.62
Hylobates_lar	0.19065	0.80935	none	799999	245464	passed	0.2105	267489	passed	0.4527	0.1592	0.2078	5322.45	0.547	0.7922	6228.99
Indri_indri	0.84098	0.15902	none	799999	148178	passed	0.1466	145175	passed	0.1505	0.1663	0.1818	4071.44	0.5054	0.8182	5331.1
Lagothrix_lagotricha	0.078869	0.92113	none	799999	231087	passed	0.2497	267225	passed	0.4796	0.1352	0.3304	5240.34	0.6059	0.6696	6104.27
Lepilemur_mustelinus	0.87246	0.12754	none	319999	154353	passed	0.1226	151131	passed	0.0649	0.2469	0.2134	5141.21	0.5199	0.7866	4206.2
Lophocebus_albigena	0.29657	0.70343	none	799999	189939	passed	0.7772	197543	passed	0.7769	0.2176	0.1795	6899.69	0.526	0.8205	6055.39
Loris_tardigradus	0.97265	0.027345	none	799999	163761	passed	0.7437	184013	passed	0.6301	0.1209	0.2129	4406.5	0.526	0.7871	6458.55
Macaca_mulatta	0.91282	0.087179	none	799999	209971	passed	0.8285	235288	passed	0.961	0.17	0.2548	5966.62	0.5881	0.7452	6519.66
Microcebus_murinus	0.76842	0.23158	none	799999	213056	passed	0.1786	219852	passed	0.1162	0.2456	0.2443	8779.25	0.5427	0.7557	6292.35
Miopithecus_talapoin	0.10811	0.89189	none	799999	207610	passed	0.109	233653	passed	0.0859	0.1562	0.1674	4473.95	0.5231	0.8326	5702.97
Nasalis_larvatus	0.7164	0.2836	none	799999	179540	passed	0.4044	194510	passed	0.2793	0.177	0.196	5257.28	0.5445	0.804	6140.61
Nycticebus_coucang	0.39461	0.60539	none	799999	256988	passed	0.3979	245513	passed	0.5708	0.4337	0.26	13660.3	0.5522	0.74	6368.57
Otolemur_crassicaudatus	0.66347	0.33653	none	639999	199312	passed	0.2009	213718	passed	0.2215	0.1566	0.1961	5247.94	0.5488	0.8039	5415.01
Pan_troglodytes_troglodytes	0.71864	0.28136	none	799999	174763	passed	0.3552	171710	passed	0.6115	0.2712	0.1978	8378.97	0.5412	0.8022	6015.34
Papio_hamadryas	0.21696	0.78304	none	799999	177040	passed	0.5528	185949	passed	0.6436	0.2071	0.1948	6036.47	0.5334	0.8052	6302.09
Perodicticus_potto	0.40553	0.59447	none	799999	244800	passed	0.5163	239642	passed	0.3987	0.338	0.2552	10892.7	0.5541	0.7448	6294.25
Propithecus_verreauxi	0.25191	0.74809	none	799999	166430	passed	0.5747	170015	passed	0.3001	0.1287	0.2135	4169.03	0.5719	0.7865	5793.68
Pygathrix_nemaeus	0.55199	0.44801	none	639999	177852	passed	0.648	188031	passed	0.307	0.1983	0.2102	6422.52	0.5384	0.7898	5746.34
Saguinus_midas	0.29608	0.70392	none	799999	175441	passed	0.2197	184049	passed	0.8618	0.1681	0.1987	4814.19	0.532	0.8013	6153.22
Saguinus_oedipus	0.58064	0.41936	none	799999	194067	passed	0.0564	204592	passed	0.059	0.1741	0.2096	6464.61	0.541	0.7904	6467.92
Saimiri_sciureus	0.12578	0.87422	none	799999	182229	passed	0.1809	178541	passed	0.3537	0.3789	0.1776	8298.41	0.525	0.8224	5851.87

## Sheet: Medulla~rest of brain
species	% preds higher than observed	% preds lower than observed	outlier status	run length	ess intercept	intercept stationarity test	p-value	ess coef predictor	coef predictor stationarity test	p-value	mean kappa	kappa freq	ess kappa	mean lambda	lambda freq	ess lambda
Alouatta_seniculus	0.16082	0.83918	none	799999	312388	passed	0.1226	280659	passed	0.1898	0.2958	0.2715	10071.7	0.4565	0.7285	5163.38
Aotus_trivirgatus	0.25043	0.74957	none	799999	247699	passed	0.6473	216293	passed	0.7025	0.2326	0.2494	7145.08	0.4464	0.7506	4824
Ateles_geoffroyi	0.95427	0.045731	none	799999	248552	passed	0.516	218626	passed	0.5933	0.2959	0.2578	9463.3	0.4531	0.7422	4829.88
Avahi_laniger	0.32221	0.67779	none	799999	279641	passed	0.1075	237315	passed	0.2181	0.2838	0.2414	8988.89	0.3997	0.7586	4643.94
Callicebus_moloch	0.15492	0.84508	none	799999	221720	passed	0.1615	205831	passed	0.1472	0.2318	0.2405	7881.17	0.4574	0.7595	5232.33
Callimico_goeldii	0.40134	0.59866	none	799999	273252	passed	0.7026	241334	passed	0.802	0.245	0.2581	9182.19	0.4288	0.7419	4824.55
Callithrix_jacchus	0.61222	0.38778	none	799999	208007	passed	0.3469	185850	passed	0.403	0.2284	0.2295	6831.5	0.4095	0.7705	4463.31
Callithrix_pygmaea	0.80137	0.19863	none	799999	230495	passed	0.4892	205605	passed	0.4791	0.2419	0.2278	8162	0.3967	0.7722	4577.6
Cebus_albifrons	0.53967	0.46033	none	799999	273912	passed	0.4275	242526	passed	0.4777	0.2828	0.2657	8642.1	0.4233	0.7343	4692.54
Cercopithecus_ascanius	0.71951	0.28049	none	799999	278569	passed	0.4487	247820	passed	0.6332	0.2081	0.2352	7046.44	0.4331	0.7648	5145.12
Cercopithecus_mitis	0.34557	0.65443	none	799999	253858	passed	0.5704	223678	passed	0.7196	0.2187	0.2597	6878.65	0.4203	0.7403	5109.88
Cheirogaleus_major	0.29498	0.70502	none	799999	324064	passed	0.5737	282425	passed	0.4505	0.2694	0.2675	9607.91	0.4237	0.7325	4812.14
Cheirogaleus_medius	0.48044	0.51956	none	799999	264857	passed	0.7504	231816	passed	0.735	0.2845	0.2539	8537.23	0.4301	0.7461	4992.27
Daubentonia_madagascariensis	0.36246	0.63754	none	799999	303269	passed	0.0608	266909	passed	0.0686	0.3249	0.2839	10244.4	0.4275	0.7161	4961.28
Erythrocebus_patas	0.39524	0.60476	none	799999	249760	passed	0.068	219169	passed	0.0882	0.2196	0.2491	6640.02	0.4274	0.7509	5003.46
Eulemur_fulvus_fulvus	0.48168	0.51832	none	799999	291204	passed	0.2672	251370	passed	0.3166	0.2838	0.2739	8391.04	0.4323	0.7261	5012.32
Galago_senegalensis	0.56733	0.43267	none	799999	281335	passed	0.3743	242422	passed	0.341	0.2975	0.2417	9274.87	0.4336	0.7583	5035.36
Galagoides_demidoff	0.87978	0.12022	none	799999	358651	passed	0.1717	301183	passed	0.2785	0.2697	0.2737	8846.94	0.4387	0.7263	5002.24
Gorilla_gorilla_gorilla	0.24238	0.75762	none	799999	452897	passed	0.5214	408504	passed	0.4651	0.4607	0.3211	13311.4	0.4471	0.6789	5159.19
Homo_sapiens	0.99962	0.00038125	negative	799999	214527	passed	0.0627	197704	passed	0.057	0.7724	0.5167	6703.65	0.5104	0.4833	5508.1
Hylobates_lar	0.53244	0.46756	none	799999	313098	passed	0.1783	277461	passed	0.257	0.3234	0.2645	10777.8	0.4286	0.7355	4920.83
Indri_indri	0.53308	0.46692	none	799999	217079	passed	0.2519	190493	passed	0.2484	0.2345	0.2723	6157.87	0.4172	0.7277	4387.57
Lagothrix_lagotricha	0.59912	0.40088	none	799999	317669	passed	0.454	279187	passed	0.5118	0.4176	0.2081	11002	0.4199	0.7919	4702.81
Lepilemur_mustelinus	0.16934	0.83066	none	799999	218639	passed	0.0657	192772	passed	0.0669	0.1773	0.249	5496.08	0.4139	0.751	4623.04
Lophocebus_albigena	0.3553	0.6447	none	799999	209639	passed	0.6916	180841	passed	0.5772	0.2947	0.1883	8279.04	0.4088	0.8117	4326.58
Loris_tardigradus	0.98532	0.01468	negative	799999	237882	passed	0.3228	203548	passed	0.3368	0.1242	0.2171	4205.95	0.4282	0.7829	5200.92
Macaca_mulatta	0.83943	0.16057	none	799999	258079	passed	0.8772	227243	passed	0.7961	0.2101	0.2853	7324.46	0.4502	0.7147	5050.72
Microcebus_murinus	0.97607	0.023928	negative	799999	391205	passed	0.1727	350060	passed	0.1177	0.1965	0.2156	6256.5	0.4783	0.7844	5984.44
Miopithecus_talapoin	0.84779	0.15221	none	799999	360106	passed	0.3644	318619	passed	0.3241	0.2594	0.2482	6139.5	0.4475	0.7518	5225.93
Nasalis_larvatus	0.10518	0.89482	none	799999	219142	passed	0.5394	188352	passed	0.6166	0.2682	0.2041	7127.61	0.4159	0.7959	4826.28
Nycticebus_coucang	0.33522	0.66478	none	799999	320010	passed	0.3629	291271	passed	0.3717	0.4322	0.2732	10063.1	0.4435	0.7268	5126.95
Otolemur_crassicaudatus	0.10267	0.89733	none	799999	412942	passed	0.4072	362370	passed	0.3772	0.2808	0.2666	8731.81	0.468	0.7334	5343.17
Pan_troglodytes_troglodytes	0.44111	0.55889	none	799999	399730	passed	0.6138	356963	passed	0.7253	0.5307	0.2518	11597.3	0.4176	0.7482	4875.45
Papio_hamadryas	0.039589	0.96041	none	799999	307161	passed	0.3414	256745	passed	0.4123	0.3462	0.2153	9516.34	0.4259	0.7847	4417.9
Perodicticus_potto	0.11214	0.88786	none	799999	240798	passed	0.0819	222006	passed	0.0639	0.1567	0.2375	4950.01	0.4587	0.7625	4999.13
Propithecus_verreauxi	0.13192	0.86808	none	799999	268024	passed	0.3011	222458	passed	0.3104	0.2852	0.2157	7154.16	0.3723	0.7843	4380.43
Pygathrix_nemaeus	0.33576	0.66424	none	799999	240833	passed	0.1872	205068	passed	0.2172	0.2823	0.2164	7822.58	0.4107	0.7836	4860.97
Saguinus_midas	0.4362	0.5638	none	799999	257045	passed	0.2115	225613	passed	0.1514	0.2315	0.2534	7608.52	0.4254	0.7466	4936.05
Saguinus_oedipus	0.53535	0.46465	none	799999	231012	passed	0.3447	201063	passed	0.4101	0.2212	0.2449	5029.25	0.4237	0.7551	4854.83
Saimiri_sciureus	0.71637	0.28363	none	799999	281818	passed	0.5519	245734	passed	0.4148	0.2836	0.2773	8520.24	0.4193	0.7227	4784.39

## Sheet: Rest of brain~body mass
species	% preds higher than observed	% preds lower than observed	outlier status	run length	ess intercept	intercept stationarity test	p-value	ess coef predictor	coef predictor stationarity test	p-value	mean kappa	kappa freq	ess kappa	mean lambda	lambda freq	ess lambda
Alouatta_palliata	0.80899	0.19101	none	319999	53158.5	passed	0.057	39918.5	passed	0.087	0.0966	0.0041	265.81	0.3042	0.9959	3229.4
Alouatta_seniculus	0.95211	0.047888	none	799999	73584.8	passed	0.2472	53277.5	passed	0.2494	0.0927	0.0041	410.11	0.2971	0.9959	3952.29
Aotus_trivirgatus	0.68823	0.31177	none	159999	48376.4	passed	0.4097	35777.2	passed	0.4469	0.099	0.0079	273.18	0.3317	0.9921	2654.93
Ateles_geoffroyi	0.45619	0.54381	none	799999	71047.2	passed	0.3095	53851.5	passed	0.3226	0.0994	0.0065	554.21	0.3282	0.9935	4611.39
Avahi_laniger	0.89243	0.10757	none	799999	63066.8	passed	0.4288	45197.6	passed	0.5027	0.094	0.007	756.37	0.2891	0.993	3844.36
Callicebus_moloch	0.6494	0.3506	none	799999	72710.6	passed	0.6352	55341.8	passed	0.6472	0.0942	0.0096	653.27	0.3257	0.9904	4187.36
Callimico_goeldii	0.46918	0.53082	none	799999	72167.5	passed	0.2942	54156.1	passed	0.3404	0.0957	0.0094	798.07	0.318	0.9906	4155.82
Callithrix_jacchus	0.69493	0.30507	none	799999	75980.3	passed	0.6254	56031.2	passed	0.7232	0.0935	0.0078	683.83	0.3204	0.9922	4421
Callithrix_pygmaea	0.47338	0.52662	none	799999	79026.6	passed	0.3879	60213.3	passed	0.4885	0.0919	0.0079	739.46	0.3226	0.9921	4516.03
Cebus_albifrons	0.21579	0.78421	none	799999	62216.2	passed	0.4731	47629.8	passed	0.4413	0.0996	0.0038	413.84	0.3079	0.9962	4296.27
Cebus_apella	0.028559	0.97144	none	799999	55549.8	passed	0.4358	43481.6	passed	0.4415	0.0926	0.0041	439.11	0.3307	0.9959	4663.6
Cercocebus_torquatus	0.088065	0.91193	none	799999	70203.4	passed	0.234	53470	passed	0.2731	0.0963	0.0095	773.76	0.3061	0.9905	4007.74
Cercopithecus_ascanius	0.10459	0.89541	none	159999	42258.5	passed	0.2205	33142.1	passed	0.0708	0.0934	0.0081	445.84	0.3001	0.9919	2320.46
Cercopithecus_mitis	0.096157	0.90384	none	639999	56704.8	passed	0.2007	44246.7	passed	0.0614	0.0928	0.0085	660.22	0.299	0.9915	3525.99
Cercopithecus_nictitans	0.74075	0.25925	none	799999	75092.2	passed	0.6084	57964	passed	0.5484	0.0944	0.0156	923.79	0.3454	0.9844	4358.93
Cheirogaleus_major	0.50701	0.49299	none	799999	77180	passed	0.5469	56906.7	passed	0.6229	0.0948	0.0091	447.21	0.3249	0.9909	4277.69
Cheirogaleus_medius	0.50348	0.49652	none	799999	81757	passed	0.121	60544.8	passed	0.1448	0.0936	0.0089	533.26	0.3248	0.9911	4272.67
Daubentonia_madagascariensis	0.046498	0.9535	none	799999	86371.5	passed	0.1925	52834.6	passed	0.2218	0.0907	0.0105	958.74	0.3287	0.9895	4912.26
Erythrocebus_patas	0.81745	0.18255	none	799999	78606.8	passed	0.2119	59634.7	passed	0.2125	0.0915	0.0109	1099.7	0.3445	0.9891	4381.7
Eulemur_fulvus_fulvus	0.57689	0.42311	none	799999	73108.7	passed	0.5771	56074.1	passed	0.5842	0.0978	0.0089	808.99	0.3248	0.9911	4416.59
Eulemur_mongoz	0.062359	0.93764	none	799999	87276.5	passed	0.1014	67124.5	passed	0.1102	0.0925	0.008	467.64	0.342	0.992	4631.99
Galago_senegalensis	0.52603	0.47397	none	799999	71647.4	passed	0.5204	53661.8	passed	0.5599	0.0996	0.0056	641	0.3311	0.9944	4124.2
Galagoides_demidoff	0.16871	0.83129	none	799999	85558.3	passed	0.5707	62932.3	passed	0.5668	0.0958	0.0075	589.68	0.3306	0.9925	4363.47
Gorilla_gorilla_gorilla	0.75414	0.24586	none	799999	66296.1	passed	0.1475	50857.1	passed	0.198	0.0932	0.0078	734.48	0.3162	0.9922	4307.54
Homo_sapiens	0.0050625	0.99494	positive	799999	95218.8	passed	0.659	72199.1	passed	0.6458	0.1414	0.0223	2108.02	0.4473	0.9777	4878.47
Hylobates_lar	0.30775	0.69225	none	479999	70933.6	passed	0.1055	52220.5	passed	0.0547	0.0957	0.0087	689.48	0.3246	0.9913	3506.21
Indri_indri	0.82788	0.17212	none	799999	66914.1	passed	0.8176	49333.9	passed	0.855	0.0941	0.0067	799.99	0.2918	0.9933	4084.07
Lagothrix_lagotricha	0.16809	0.83191	none	799999	64888.1	passed	0.6745	49940	passed	0.6912	0.0955	0.0078	614.99	0.3461	0.9922	4862.09
Lemur_catta	0.57575	0.42425	none	799999	70099.2	passed	0.0974	52369.4	passed	0.1408	0.0959	0.0089	643.52	0.3235	0.9911	4234.45
Lepilemur_mustelinus	0.89573	0.10427	none	799999	70878.4	passed	0.4671	51746.8	passed	0.436	0.0945	0.0059	721.39	0.3048	0.9941	3959.05
Lophocebus_albigena	0.014026	0.98597	positive	799999	74498.8	passed	0.2216	59003.4	passed	0.29	0.0974	0.0115	896.51	0.3204	0.9885	4050.34
Loris_tardigradus	0.34234	0.65766	none	799999	67087.9	passed	0.4365	50428	passed	0.4457	0.0964	0.0081	690.12	0.3254	0.9919	4211.91
Macaca_mulatta	0.36816	0.63184	none	799999	73347.3	passed	0.6627	56129.4	passed	0.7007	0.0952	0.0077	644.44	0.3161	0.9923	4301.48
Mandrillus_sphinx	0.73939	0.26061	none	799999	92867.5	passed	0.0711	71641.3	passed	0.0595	0.0945	0.0134	1020.32	0.3498	0.9866	4671.01
Microcebus_murinus	0.70859	0.29141	none	799999	74350.3	passed	0.0815	54697.3	passed	0.1055	0.0939	0.0083	634.54	0.3259	0.9917	4421.21
Miopithecus_talapoin	0.26014	0.73986	none	799999	70612.6	passed	0.171	55569.4	passed	0.1483	0.0975	0.0082	597.93	0.3059	0.9918	4209.68
Nasalis_larvatus	0.087291	0.91271	none	799999	87216	passed	0.4077	67487.9	passed	0.5408	0.0927	0.0235	1488.32	0.3491	0.9765	4411.23
Nycticebus_coucang	0.35633	0.64367	none	799999	66678.6	passed	0.4491	50333.7	passed	0.3715	0.0973	0.0083	664.43	0.3288	0.9917	4345.71
Otolemur_crassicaudatus	0.94041	0.059586	none	799999	174972	passed	0.4051	143056	passed	0.5306	0.0893	0.0062	946.9	0.3371	0.9938	4882.98
Pan_paniscus	0.54406	0.45594	none	799999	61512.1	passed	0.4127	46404.9	passed	0.5753	0.0951	0.0038	267.38	0.3176	0.9962	3852.44
Pan_troglodytes_troglodytes	0.95954	0.040458	none	799999	50075.9	passed	0.1338	39059.2	passed	0.138	0.0982	0.0096	521.54	0.3418	0.9904	4090.84
Papio_anubis	0.80122	0.19878	none	799999	103008	passed	0.6592	78614.3	passed	0.6292	0.0972	0.0192	1431.54	0.3527	0.9808	4557.92
Perodicticus_potto	0.38044	0.61956	none	799999	73602.3	passed	0.267	55496.5	passed	0.3336	0.0979	0.0081	829.29	0.3377	0.9919	4469.13
Piliocolobus_badius	0.82955	0.17045	none	799999	69890	passed	0.3521	53726.5	passed	0.2958	0.0937	0.0069	614.02	0.3317	0.9931	4565.81
Pithecia_pithecia	0.23423	0.76577	none	639999	64430.6	passed	0.0869	48509.7	passed	0.0782	0.0914	0.0097	1083.99	0.3257	0.9903	3801.95
Pongo_pygmaeus	0.77876	0.22124	none	799999	63677.8	passed	0.594	49738.3	passed	0.6144	0.0925	0.0082	726.44	0.3192	0.9918	4139.99
Propithecus_verreauxi	0.49455	0.50545	none	799999	63300.6	passed	0.7175	46138	passed	0.7637	0.0918	0.0114	993.74	0.3273	0.9886	4272.96
Pygathrix_nemaeus	0.91095	0.089054	none	799999	75486.3	passed	0.1594	57920.4	passed	0.1851	0.0939	0.0081	548.96	0.3438	0.9919	4690.03
Saguinus_midas	0.80755	0.19245	none	799999	83854.4	passed	0.3082	62057.9	passed	0.3755	0.0912	0.0071	606.51	0.3256	0.9929	4611.04
Saguinus_oedipus	0.60694	0.39306	none	799999	85384.4	passed	0.343	64078.5	passed	0.391	0.0912	0.0078	746.71	0.3291	0.9922	4749.32
Saimiri_sciureus	0.62778	0.37222	none	799999	70780.9	passed	0.1971	53321.3	passed	0.2276	0.0969	0.0088	659.66	0.3274	0.9912	4407.79
Semnopithecus_entellus	0.72664	0.27336	none	799999	75787	passed	0.652	57879.2	passed	0.6787	0.0937	0.0069	696.47	0.3219	0.9931	4421.12
Tarsius_syrichta	0.74116	0.25884	none	799999	63824.4	passed	0.0881	57044.3	passed	0.124	0.0944	0.013	1063.3	0.3476	0.987	4338.42
Varecia_variegata_variegata	0.50166	0.49834	none	799999	70151.2	passed	0.3705	52243.3	passed	0.487	0.0943	0.009	669.1	0.3295	0.991	4293.47
