# Supplementary material for: Quantitative uniqueness of human brain evolution revealed through phylogenetic comparative analysis
Source: eLife journal article supplement (doi:10.7554/elife.41250), 2019-01-31
Supplement: supp [file elife-41250-supp-v1.zip]

Archive with 8 entries (8 files):
- elife_poa_e41250_Figure_2_figure_supplement_1.jpg
- elife_poa_e41250_Figure_4_figure_supplement_1.jpg
- elife_poa_e41250_Figure_3_figure_supplement_1.jpg
- elife_poa_e41250_Figure_1_figure_supplement_1.jpg
- elife_poa_e41250_Source_data_2.zip
- elife_poa_e41250_Source_code_1.zip
- elife_poa_e41250_Source_data_1.zip
- elife_poa_e41250_Transparent_Reporting_File.pdf
