# Supplementary figures and images for: Quantitative uniqueness of human brain evolution revealed through phylogenetic comparative analysis
Source: eLife journal article supplement (doi:10.7554/elife.41250), 2019-01-31

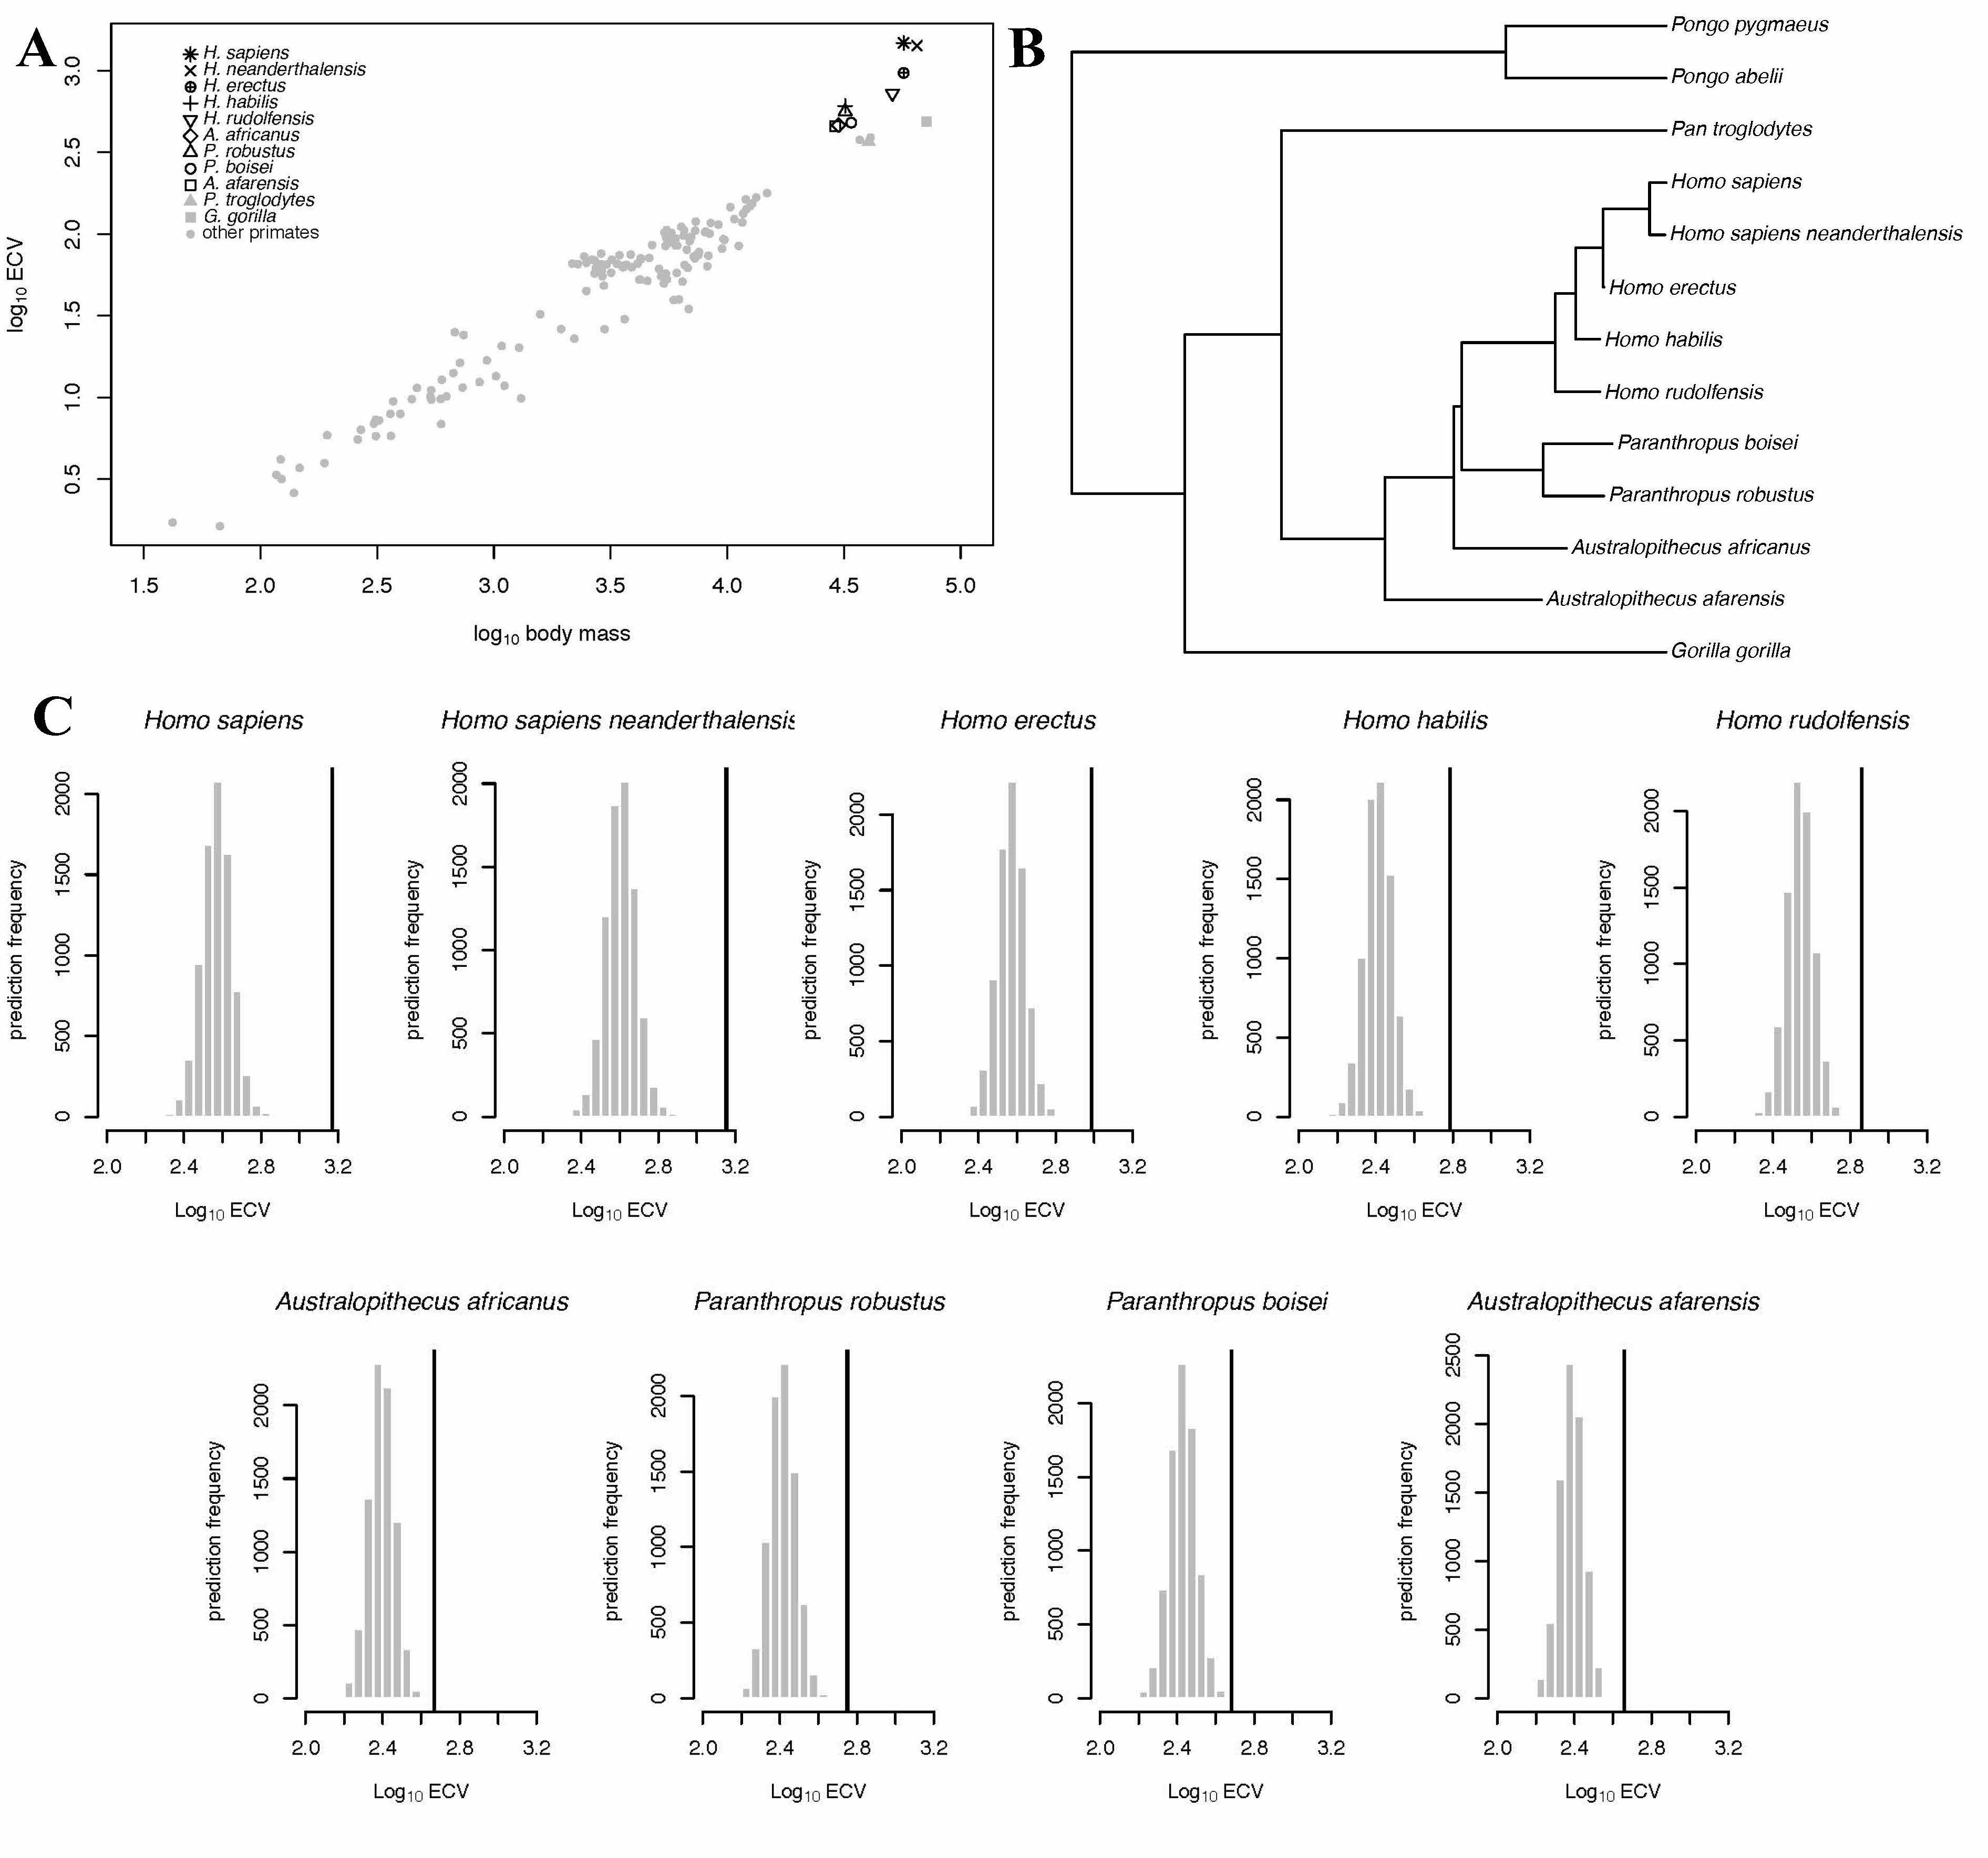

Supplement: supp [file elife-41250-supp-v1.zip › elife_poa_e41250_Figure_2_figure_supplement_1.jpg]

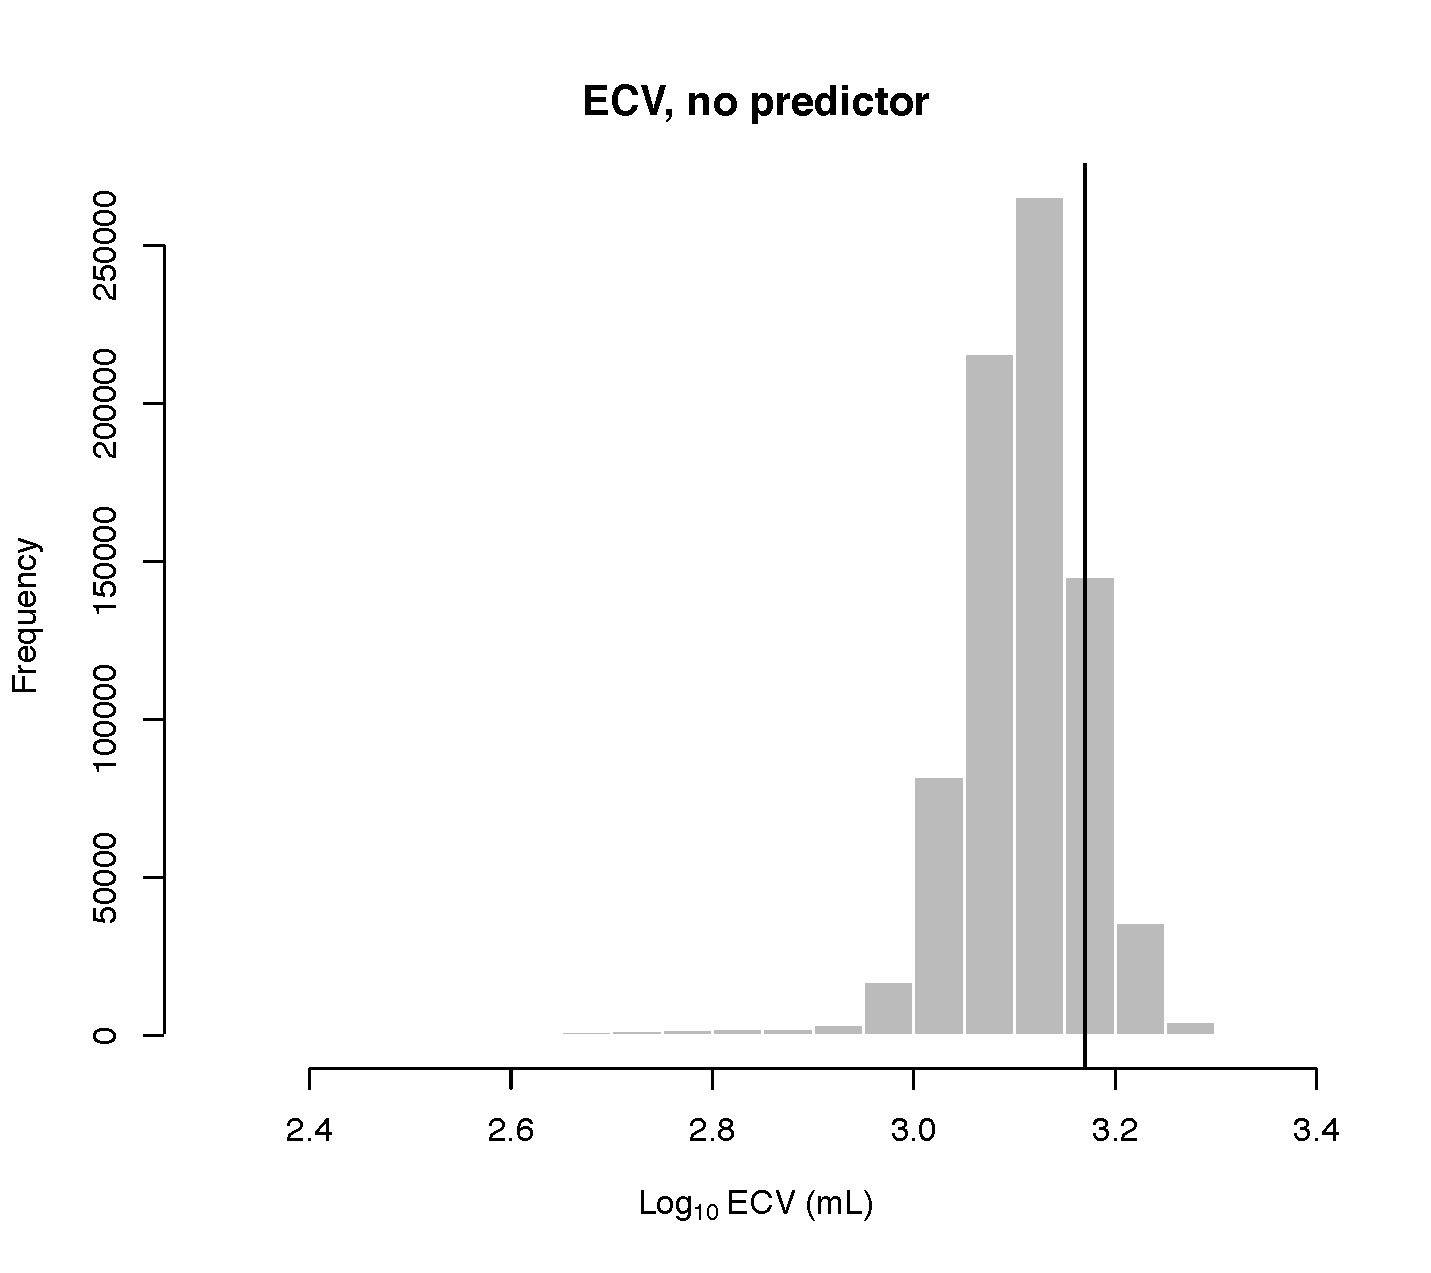

Supplement: supp [file elife-41250-supp-v1.zip › elife_poa_e41250_Figure_4_figure_supplement_1.jpg]

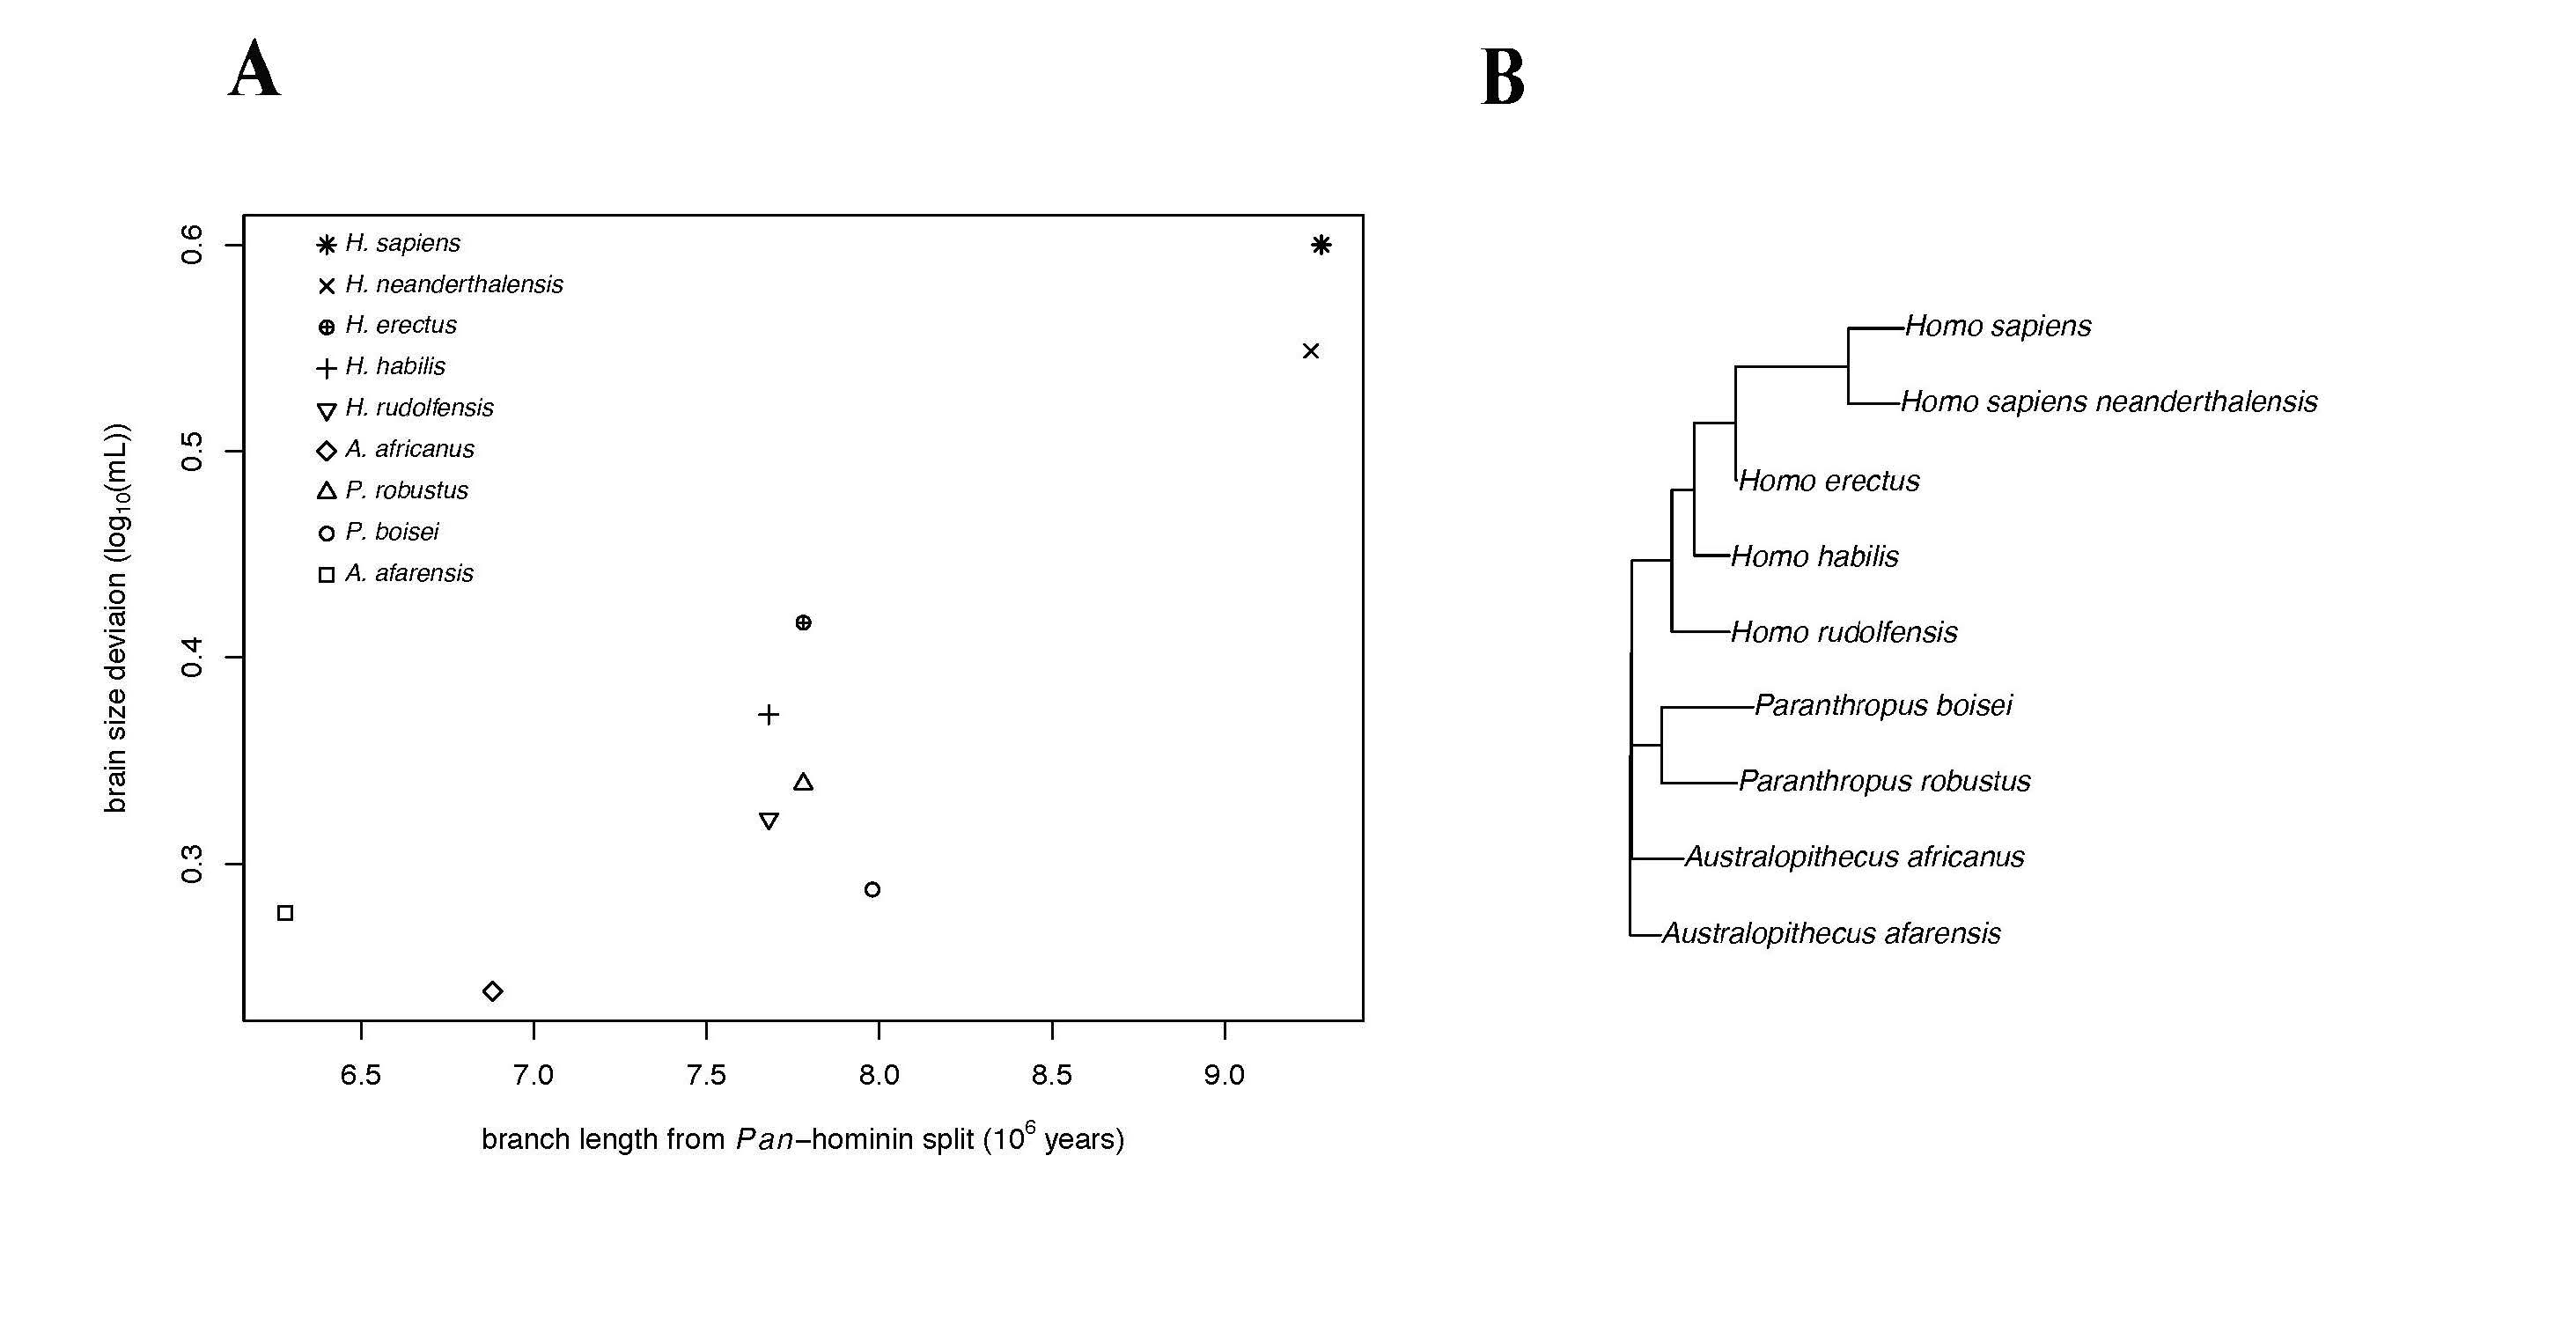

Supplement: supp [file elife-41250-supp-v1.zip › elife_poa_e41250_Figure_3_figure_supplement_1.jpg]

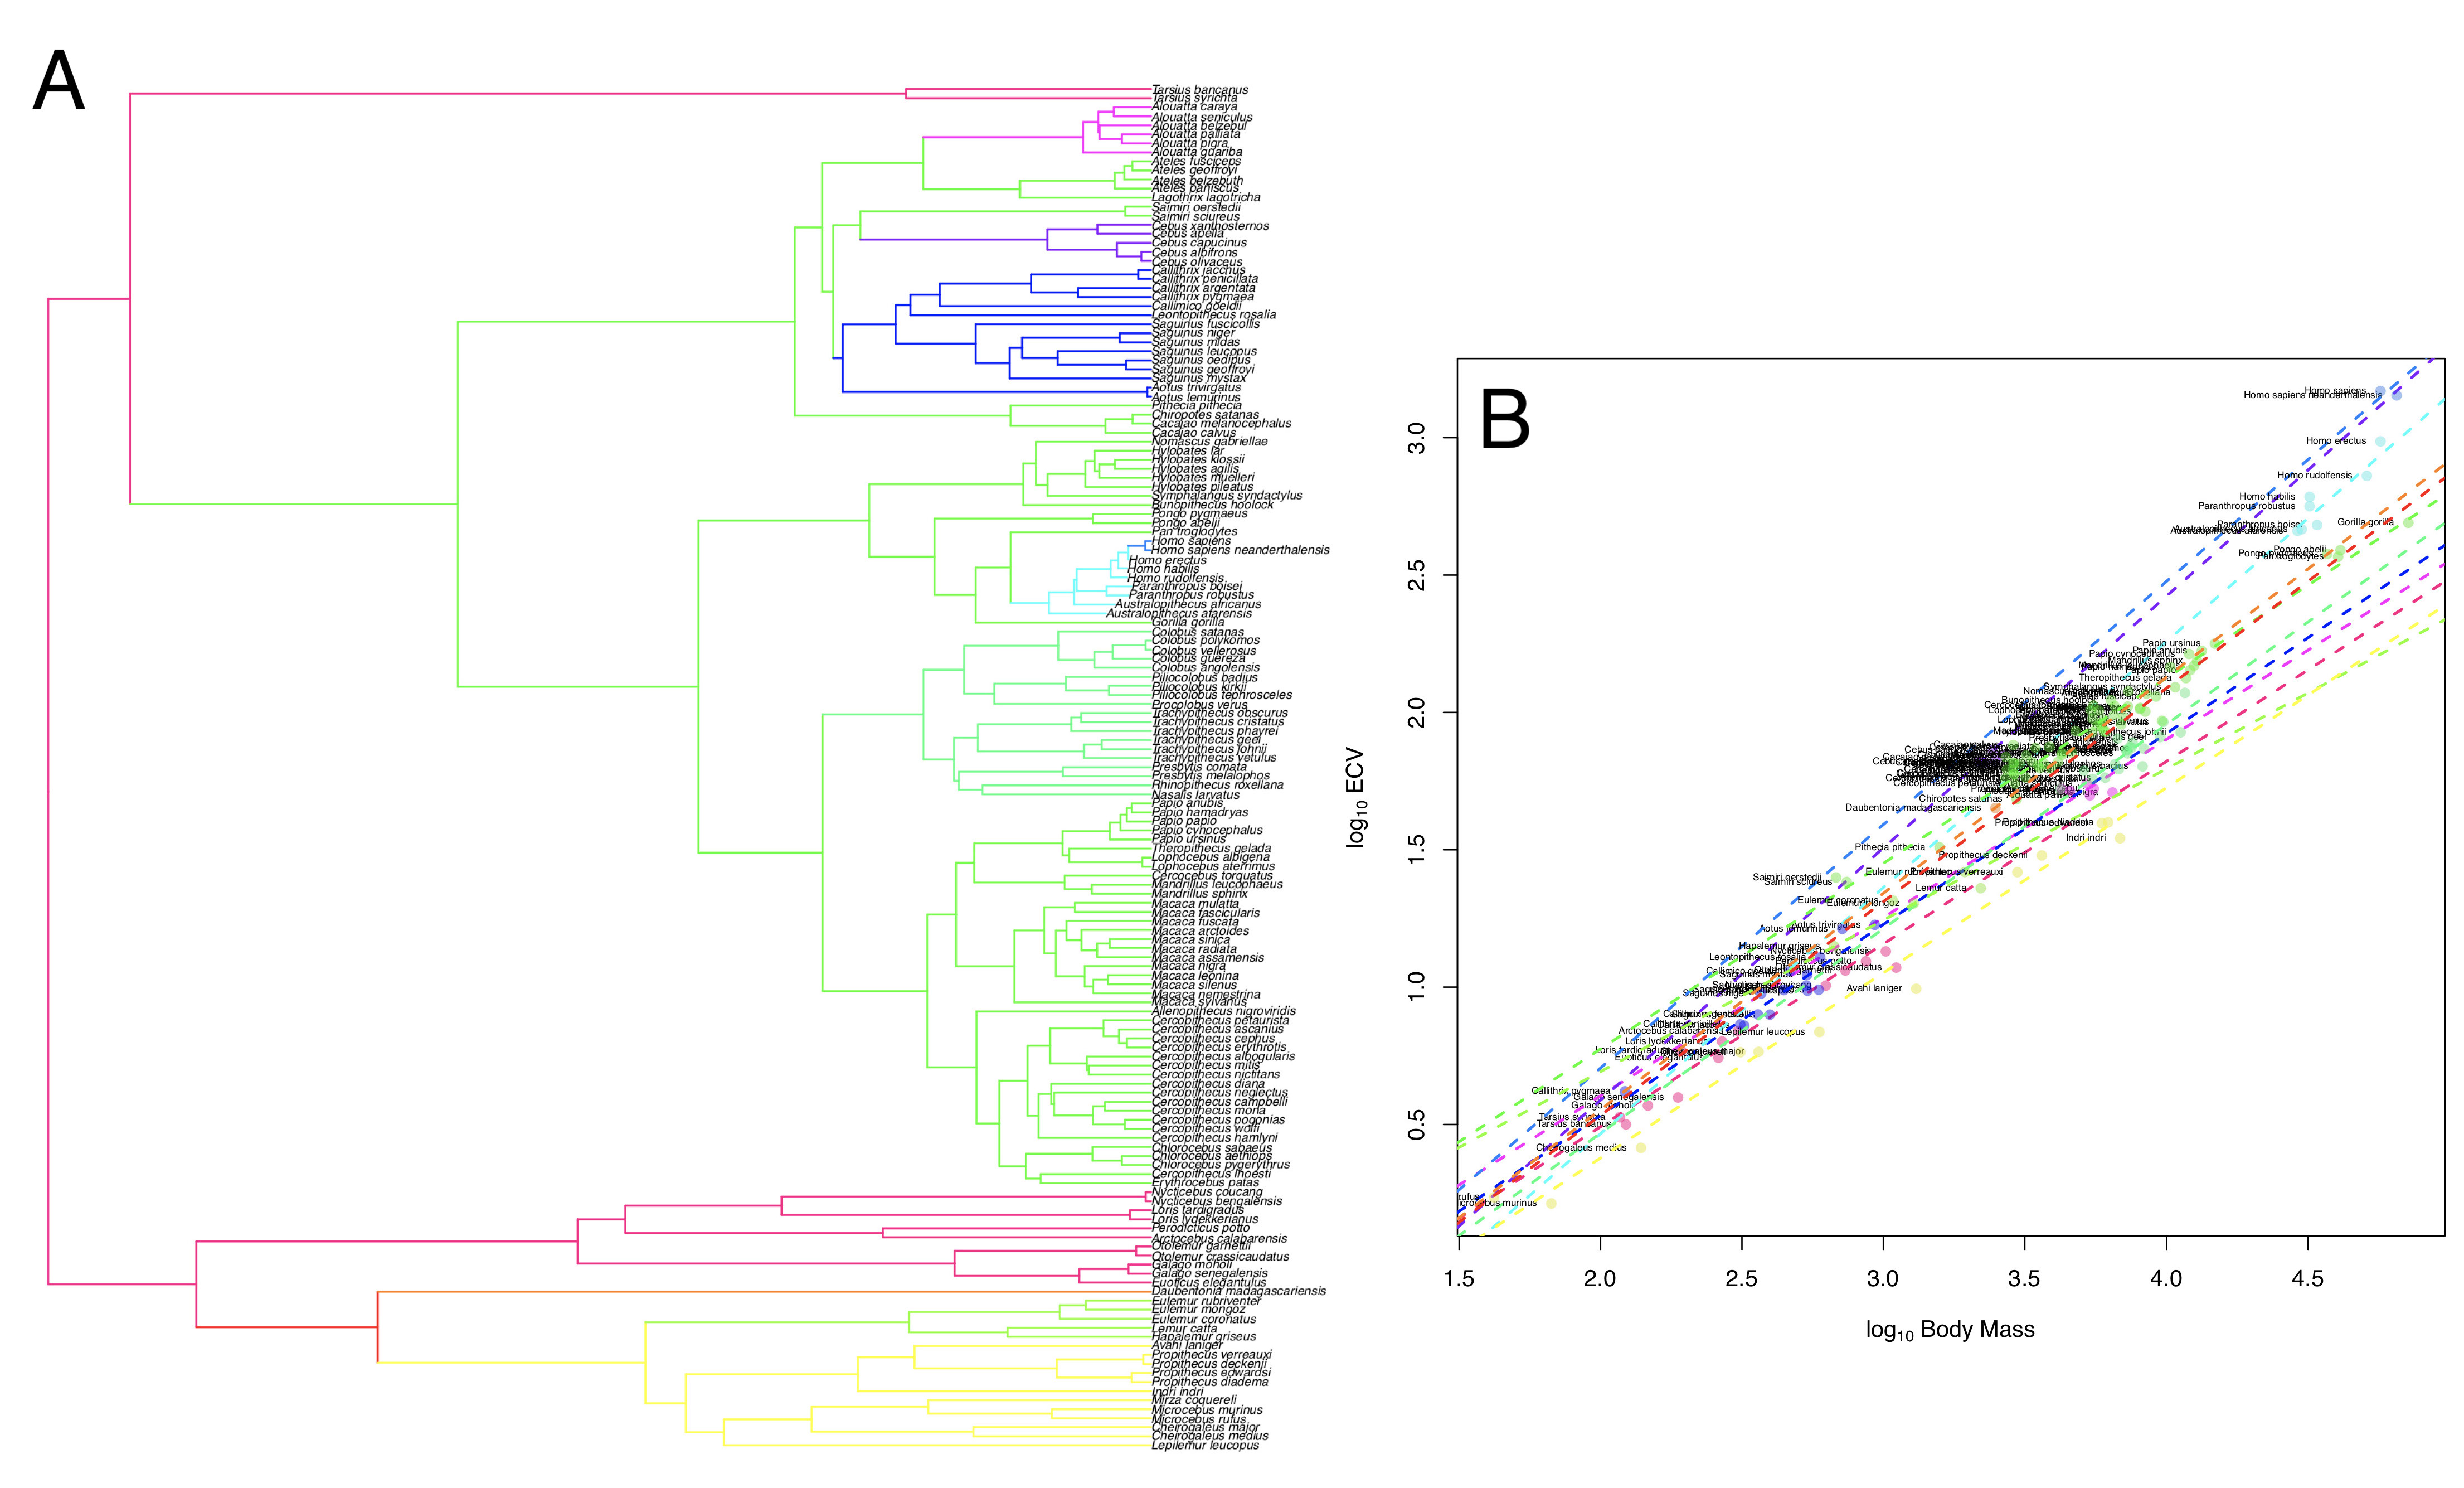

Supplement: supp [file elife-41250-supp-v1.zip › elife_poa_e41250_Figure_1_figure_supplement_1.jpg]
